1 **SARS-CoV-2 Damages Cardiomyocytes Mitochondria and Implicates**

2 **Long COVID-associated Cardiovascular Manifestations**

3

4 Wenliang Che<sup>1,7</sup>, Shuai Guo<sup>2,7</sup>, Yanqun Wang<sup>3,7</sup>, Xiaohua Wan<sup>4</sup>, Bingyu Tan<sup>5</sup>, Hailing Li<sup>1</sup>,

5 Jiasuer Alifu<sup>1</sup>, Mengyun Zhu<sup>1</sup>, Cesong Chen<sup>2</sup>, Peiyao Li<sup>2</sup>, Zhaoyong Zhang<sup>3</sup>, Yiliang

6 Wang<sup>3</sup>, Xiaohan Huang<sup>3</sup>, Xinsheng Wang<sup>4</sup>, Jian Zhu<sup>2</sup>, Xijiang Pan<sup>5</sup>, Fa Zhang<sup>4</sup>, Peiyi

7 Wang<sup>2</sup>, Jincun Zhao<sup>3,6\*</sup>, Yawei Xu<sup>1\*</sup> and Zheng Liu<sup>1,2,8\*</sup>

8

9 <sup>1</sup> Department of Cardiology, Shanghai Tenth People's Hospital, Tongji University School  
10 of Medicine, Shanghai, China

11 <sup>2</sup> Cryo-electron Microscopy Center, Southern University of Science and Technology,  
12 Shenzhen, China

13 <sup>3</sup> State Key Laboratory of Respiratory Disease, National Clinical Research Center for  
14 Respiratory Disease, Guangzhou Institute of Respiratory Health, The First Affiliated  
15 Hospital of Guangzhou Medical University, Guangzhou, China

16 <sup>4</sup> School of Medical Technology, Beijing Institute of Technology, Beijing, China

17 <sup>5</sup> Shanghai NanoPort, Thermo Fisher Scientific Inc., Shanghai, China

18 <sup>6</sup> Guangzhou National Laboratory, Bio-Island, Guangzhou, China

19 <sup>7</sup> These authors contributed equally

20 <sup>8</sup> Lead contact

21 \* Correspondence: liuz3@sustech.edu.cn (Z.L.), xuyawei@tongji.edu.cn (Y.X.),  
22 zhaojincun@gird.cn (J.Z.).

23

24 **Abstract**

25 Our study investigates the persistent cardiovascular symptoms observed in individuals  
26 long after contracting SARS-CoV-2, a condition commonly referred to as “Long COVID”,  
27 which has significantly affected millions globally. We meticulously describe the  
28 cardiovascular outcomes in five patients, encompassing a range of severe conditions  
29 such as sudden cardiac death during exercise, coronary atherosclerotic heart disease,  
30 acute inferior myocardial infarction, and acute myocarditis. All five patients were  
31 diagnosed with myocarditis, confirmed through endomyocardial biopsy and histochemical  
32 staining, which identified inflammatory cell infiltration in their heart tissue. Crucially,  
33 electron microscopy revealed widespread mitochondrial vacuolations and the presence  
34 of myofilament degradation within the cardiomyocytes of these patients. These findings  
35 were mirrored in SARS-CoV-2-infected mice, suggesting a potential underlying cellular  
36 mechanism for the cardiac effects associated with Long COVID. Our report sheds light  
37 on the cardiovascular implications of Long COVID and underscores the importance of  
38 further research to understand its cellular underpinnings.

39

40 **Keywords:** Long COVID; SARS-COV-2; endomyocardial biopsy; mitochondria disorder.

41

## 42 INTRODUCTION

43 Severe acute respiratory syndrome coronavirus 2 (SARS-COV-2), the causative agent of  
44 the coronavirus disease 2019 (COVID-19) pandemic, emerged in late 2019 and rapidly  
45 spread around the world. By the end of June 2023, there have been more than 775 million  
46 confirmed cases of COVID-19, with over 7.0 million fatalities worldwide  
47 (<https://covid19.who.int/>). While primarily affecting the respiratory system, SARS-CoV-2  
48 is also linked to multi-organ dysfunctions, with a notable impact on the cardiovascular  
49 system. The virus utilizes the angiotensin-converting enzyme 2 (ACE2) receptor, which  
50 is abundantly expressed in cardiomyocytes, to enter human cells, thereby underlining a  
51 pathway to cardiac involvement (Shang et al., 2020; Yang et al., 2021). Clinical reports  
52 have underscored the cardiovascular complications associated with COVID-19, including  
53 myocardial injury, arrhythmias, and severe clinical outcomes (Guo et al., 2020; Huang et  
54 al., 2020; Wang et al., 2020).

55  
56 Beyond the acute phase, a considerable number of recovered patients experience long-  
57 term cardiovascular issues, such as cerebrovascular disorders, dysrhythmias, and  
58 myocarditis, contributing to the spectrum of “Post-acute COVID-19 Syndrome” or “Long  
59 COVID” (Nalbandian et al., 2021; Xie et al., 2022). Long COVID is broadly defined as  
60 signs, symptoms, and conditions that continue or develop after initial COVID-19 or SARS-  
61 CoV-2 infection. The signs, symptoms, and conditions persist for four weeks or more after  
62 the initial phase of infection. This working definition was developed by the U.S.  
63 Department of Health and Human Services in collaboration with CDC, NIH, and medical  
64 societies (<https://www.covid.gov/longcovid/>). A recent longitudinal cohort study has

65 reported that approximately one in eight patients, or 12.7%, have symptoms attributed to  
66 COVID-19, and that chest pain is one of the most commonly reported symptoms of Long  
67 COVID (Ballering et al., 2022).

68

69 The specific pathophysiology underlying cardiovascular manifestations in Long COVID  
70 remains largely unexplored. Our investigation provides histopathological and electron  
71 microscopic analyses from endomyocardial biopsies of five patients who experienced  
72 various cardiovascular outcomes, such as acute myocarditis and myocardial fibrosis,  
73 within one to three months post-COVID-19 recovery. Findings include inflammatory cell  
74 infiltration, myofilament degradation, and notably, extensive mitochondrial vacuolations  
75 and lipofuscin accumulation within cardiomyocytes. These observations suggest a  
76 profound impact of SARS-CoV-2 on mitochondrial integrity, potentially elucidating a  
77 cellular mechanism behind the cardiovascular sequelae of Long COVID.

78

## 79 RESULTS

### 80 Ultrastructural disorder in cardiomyocytes in a patient suffer sudden cardiac death

81 A 30's male suffered a syncope during exercise, leading to lost consciousness, cessation  
82 of breathing, and absence of carotid pulse. Immediate intervention with two cycles of  
83 cardiopulmonary resuscitation (CPR) and automated external defibrillator (AED)  
84 deployment successfully restored his heartbeat and breathing, although he remained  
85 unconscious. Upon regaining consciousness en route to emergency room, the patient  
86 had limited recollection of the event. Initial assessment in the coronary care unit (CCU)  
87 for further diagnosis. The electrocardiogram (ECG) at the time of the AED discharge  
88 indicated ventricular fibrillation, prompted further investigation (**Figure S1** and **Fig. 1A**).

89  
90 The patient has recent recovered from COVID-19, 37 days prior to the incident, was  
91 notable in the absence of any chronic health conditions or familial cardiovascular disease  
92 history. Comprehensive laboratory assessments revealed generally normal results, with  
93 specific abnormalities including elevated cardiac biomarkers (Troponin T, creatine  
94 kinase-MB, and myoglobin) and abnormal neutrophil counts indicative of myocardial  
95 injury and inflammation, respectively (**Table S1**). All pathogen tests, including SARS-  
96 CoV-2 and Coxsackie virus, were negative. Additional investigations resulted in no signs  
97 of rheumatic heart disease, autoimmune disease, and tumors that may cause myocardial  
98 injury. We considered possible viral myocarditis (VMC), however, only suspicious  
99 myocardial edema in the anterior subepicardial with no significant delayed enhancement  
100 in cardiac magnetic resonance (CMR, **Figure 1B** and **1C**). Coronary angiography (CAG)  
101 confirmed unobstructed coronary arteries. Further diagnostic tools, including ECG,

102 echocardiography (Echo), 24-h dynamic electrocardiogram, endocardial  
103 electrophysiological examination, and genetic analysis, revealed no abnormalities.

104

105 Endomyocardial biopsy remains the gold standard mode of investigation for diagnosing  
106 many cardiac conditions, including suspected myocarditis, heart failure of unknown  
107 etiology, cardiomyopathy, arrhythmia, heart transplant rejection and secondary  
108 involvement by systemic diseases (Cunningham et al., 2006). To further clarify the  
109 pathogeny of the patient, an endomyocardial biopsy was performed. The biopsy sample  
110 underwent immunohistochemical analysis to characterize inflammatory cell infiltration by  
111 using the following antibodies: CD3, CD4, CD8, CD9, CD20, and CD68. Only CD68  
112 showed weekly positive, which indicated a minimal presence of macrophages (**Table S1**).

113 A Masson's trichrome staining highlighted interstitial collagen fiber deposition, suggesting  
114 fibrosis (**Figure 1D**), which were also confirmed as fibrosis in hematoxylin-eosin (HE)  
115 staining and under electron microscopy (**Figure 1E, 1F, 1G, and Figure S2A**). Both HE  
116 staining and electron microscopy revealed loss of myofibrillar bundles, interstitial oedema  
117 and necrosis (**Figure 1F, 1H, 1I, Figure S2B, and S2C**), which indicated myocytes  
118 degeneration. Notably, electron microscopy examination revealed lipofuscin granules  
119 accumulation in myocardial cells (**Figure 1J and Figure S2D**), the same kind of lipofuscin  
120 pigments was previously observed in sudden cardiac death (Kakimoto et al., 2019).

121 Interestingly, we observed disordered myocardial ultrastructure in the biopsy tissue,  
122 especially in the mitochondria: a significant number of mitochondria were swollen and  
123 vacuolated, with distorted and broken cristae (**Figure 1K, 1L, and Figure S2E**). Swollen  
124 and degenerating mitochondria were previously observed in autoimmune myocarditis in

125 rat models (Skrzypiec-Spring et al., 2018; Skrzypiec-Spring et al., 2021). Unsurprisingly,  
126 we did not observe any SARS-CoV-2 virus in the endomyocardial biopsy sample, since  
127 the patient has test negative for almost a month. The immunohistochemical analysis,  
128 Masson's trichrome staining, HE staining, and electron microscopic analysis aid in the  
129 diagnosis of myocarditis (Sagar et al., 2012). Throughout his hospitalization, Patient #1  
130 received guideline-based care, including cardiac monitoring, oxygen therapy, and  
131 antiarrhythmic medications, leading to a stable discharge after ten days.

132

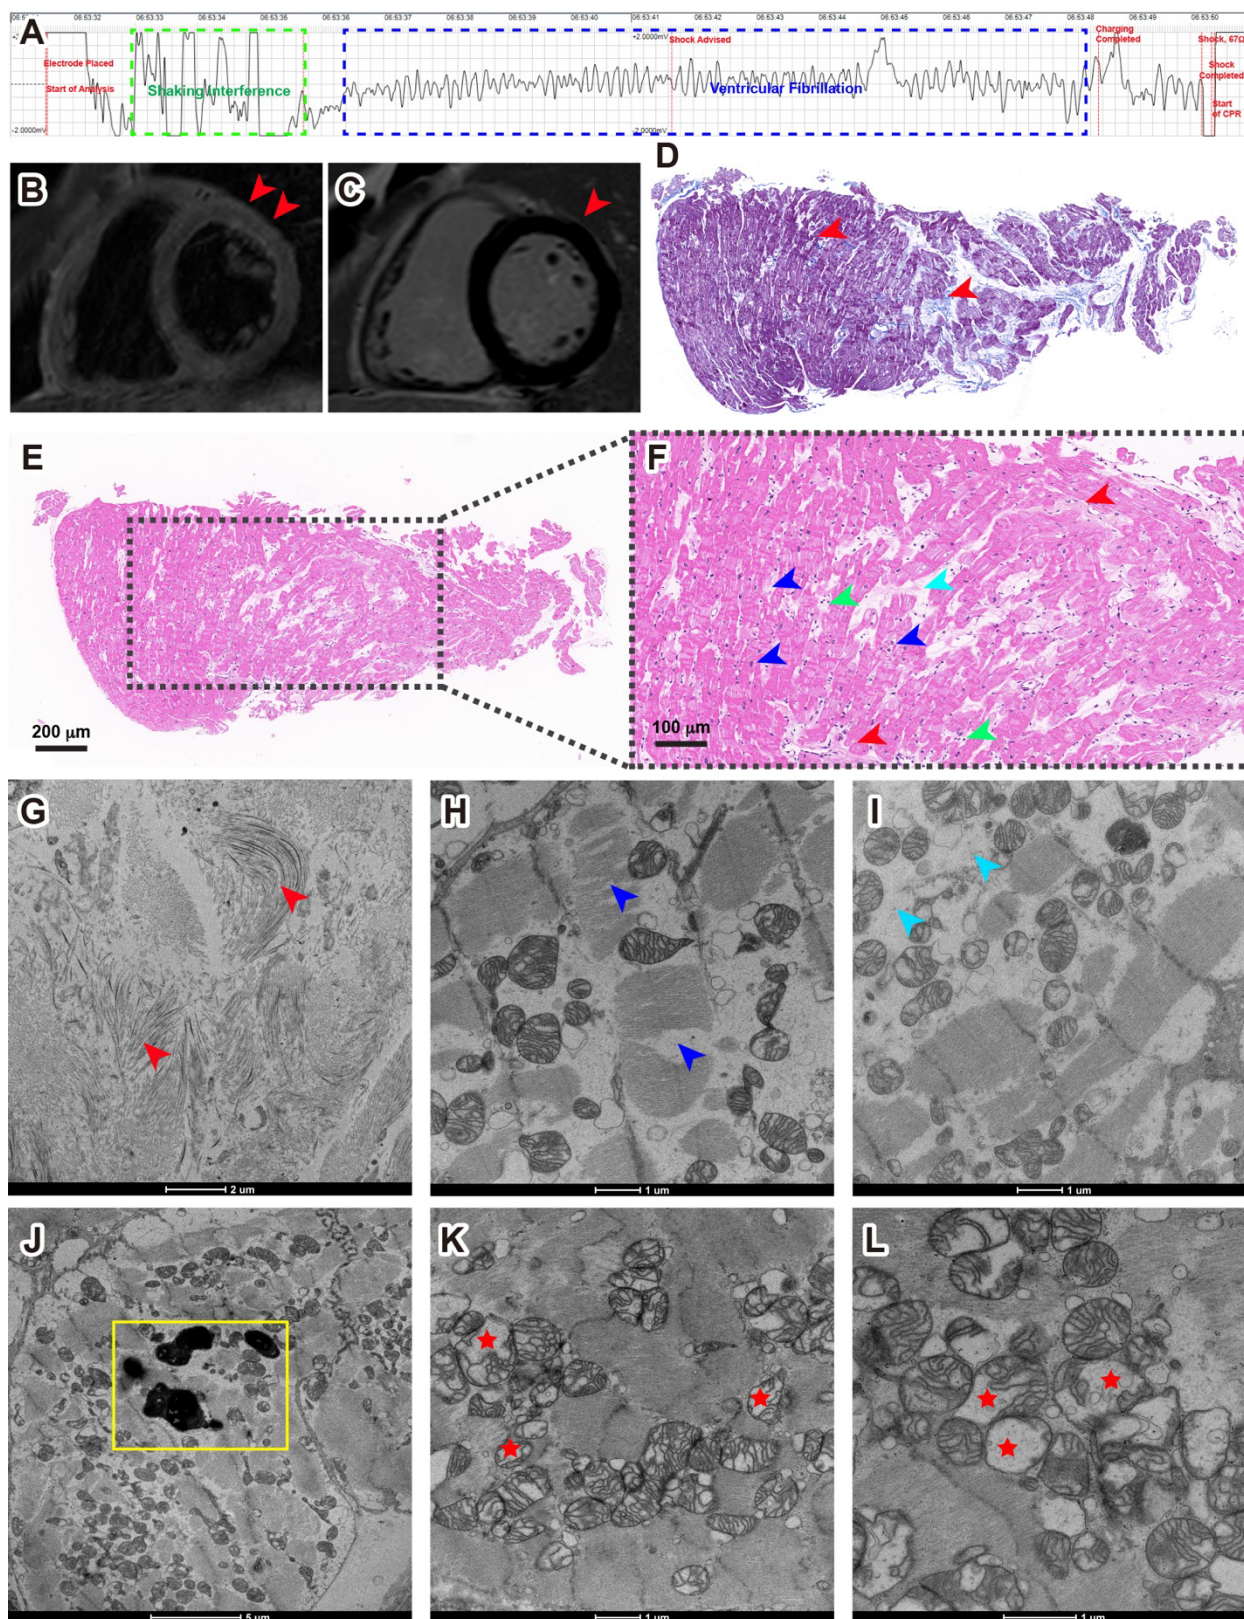

133

134 **Figure 1. Spectrum of myocarditis in COVID-19 Patient #1.**



135 (A) ECG recordings retrieved from the AED, shows coarse ventricular fibrillation before  
136 the shock (blue frame).

137 (B) CMR imaging of the patient, both T2-weighted sequences (T2WI) and short inversion  
138 time inversion recovery sequences (STIR) showed no myocardial edema in the mid short-  
139 axis slices.

140 (C) a late enhancement was not observed in late gadolinium enhancement (LGE)  
141 sequences of the mid short-axis slices in the myocardium. Red arrowheads indicated  
142 suspected myocardial edema under the epicardium of the anterior wall (basal part),  
143 without significant delayed enhancement.

144 (D) Masson's trichrome staining displayed interstitial collagen fiber deposits (red  
145 arrowheads).

146 (E) HE analysis shows an abnormal structure in the myocardium.

147 (F) zoomed view, shows interstitial collagen fiber accumulation (red arrowheads), loss of  
148 integrity of myofibrillar bundles (blue arrowheads), and edema and necrosis of myofibrillar  
149 bundles (cyan arrowhead); Myofibrillar interstitial infiltration with inflammatory cells is also  
150 observed (green arrowheads).

151 (G) electron micrographs of the biopsy sample from the patient, showing local myofibrillar  
152 fibrosis and proliferation of fibroblasts (red arrowheads);

153 (H) loss of integrity of myofibrillar bundles (blue arrowheads);

154 (I) necrosis of myofibrillar bundles (cyan arrowheads);

155 (J) lipofuscin granules in the cardiomyocytes (yellow frames);

156 (K) and (L) a significant amount of vacuolations in the mitochondria (red stars).

157

158 **Ultrastructural disorder in cardiomyocytes in a patient suffer chest tightness,**  
159 **palpitation and fatigue**

160 As shown in **Table 1**, Patient #2 is a 60's male who presented with Long COVID  
161 symptoms including chest tightness, palpitations, and fatigue persisting for one month  
162 prior to hospital admission. His medical history was notable for hypertension, with no  
163 other chronic cardiovascular conditions. Initial diagnostics revealed abnormal Q waves  
164 and ST segment depression in the III and avF leads on the ECG, and an Echo indicated  
165 impaired diastolic heart function. Laboratory tests showed mildly elevated troponin T  
166 (cTnT) levels. CAG found no evidence of coronary stenosis, but CMR imaging displayed  
167 delayed enhancement in the anterior septal muscle layer of the left ventricle's basal and  
168 middle levels, suggestive of myocardial fibrosis.

169  
170 An endomyocardial biopsy performed 38 days post-infection revealed significant findings.  
171 Masson's trichrome staining highlighted interstitial collagen fiber deposition (**Figure 2A**  
172 and **2B**). HE staining demonstrated interstitial collagen accumulation, disrupted  
173 myofibrillar bundle integrity, and interstitial infiltration by inflammatory cells (**Figure 2C**  
174 and **2D**). Immunohistochemical analysis showed a lack of reactivity for CD3, CD4, CD8,  
175 CD9, and CD20, with only a weak positive signal for interstitial CD68 (**Table 1**). Electron  
176 microscopy further detailed local myofibrillar fibrosis, fibroblast proliferation, muscle  
177 bundle edema, loss of myofibrillar integrity, presence of lipofuscin granules in  
178 cardiomyocytes, and significant mitochondrial vacuolations (**Figure 2E-2J**), mirroring the  
179 pathological changes observed in Patient #1 and reinforcing the diagnosis of myocarditis.  
180

181 Throughout his hospitalization, the patient underwent rigorous cardiac monitoring and  
182 was administered a comprehensive treatment regimen that included antiplatelet,  
183 antihypertensive, lipid-regulating, and myocardial remodeling-improving medications as  
184 secondary prevention measures. Following a stable 10-day hospitalization without any  
185 Major Adverse Cardiovascular Events (MACE), he was discharged, marking a critical step  
186 towards recovery.

**Table 1. Summary data for 5 patients**

|                                                              | Patient #1                                                                     | Patient #2                                | Patient #3                                                                                                          | Patient #4                                                                                                                | Patient #5                                                |
|--------------------------------------------------------------|--------------------------------------------------------------------------------|-------------------------------------------|---------------------------------------------------------------------------------------------------------------------|---------------------------------------------------------------------------------------------------------------------------|-----------------------------------------------------------|
| <b>Sex</b>                                                   | Male                                                                           | Male                                      | Male                                                                                                                | Male                                                                                                                      | Male                                                      |
| <b>Age</b>                                                   | 26-30                                                                          | 66-70                                     | 41-45                                                                                                               | 65-70                                                                                                                     | 31-35                                                     |
| <b>Days between COVID-19 infection and myocardial biopsy</b> | 37                                                                             | 38                                        | 58                                                                                                                  | 76                                                                                                                        | 85                                                        |
| <b>Diagnosis</b>                                             | 1. Viral myocarditis<br>2. Sudden cardiac death<br>3. Ventricular fibrillation | 1. Viral myocarditis<br>2. Hypertension   | 1. Viral myocarditis                                                                                                | 1. Viral myocarditis<br>2. Atrial fibrillation<br>3. Personal history of cerebral infarction                              | 1. Viral myocarditis                                      |
| <b>Symptoms</b>                                              | syncope                                                                        | chest tightness<br>palpitation<br>fatigue | chest tightness<br>fever                                                                                            | chest tightness<br>dyspnea                                                                                                | chest pain                                                |
| <b>ECG</b>                                                   | ventricular fibrillation                                                       | abnormal Q waves<br>ST segment depression | sinus tachycardia,<br>elevation of ST segments of II, III, avF, V5, V6 leads and abnormal Q waves of III, avF leads | frequent ventricular premature beats,<br>frequent atrial premature beats,<br>Atrial fibrillation<br>ST-segment depression | normal                                                    |
| <b>Cardiac biomarkers</b>                                    | cTnT ↑<br>CK-MB ↑<br>Myoglobin ↑                                               | cTnT ↑                                    | cTnT ↑<br>Myoglobin ↑<br>CK-MB ↑<br>NT-pro BNP ↑                                                                    | cTnT ↑<br>NT-pro BNP ↑                                                                                                    | cTnT ↑<br>CK-MB ↑<br>Myoglobin ↑<br>NT-pro BNP ↑<br>CRP ↑ |
| <b>Echo</b>                                                  | no anomalies                                                                   | decreased diastolic function of the heart | no anomalies                                                                                                        | no anomalies                                                                                                              | no anomalies                                              |
| <b>CAG</b>                                                   | clean LAD, LCX and RCA arteries, Normal for EP study                           | no significant stenosis                   | 40% stenosis of LAD arteries                                                                                        | clean LAD, LCX and RCA arteries                                                                                           | clean LAD, LCX and RCA arteries                           |

|                                                      |                                                                                                                                                                                                     |                                                                                                                                                                                                     |                                                                                                                                                                                                     |                                                                                                                                                                                                     |                                                                                                                                                                                                     |
|------------------------------------------------------|-----------------------------------------------------------------------------------------------------------------------------------------------------------------------------------------------------|-----------------------------------------------------------------------------------------------------------------------------------------------------------------------------------------------------|-----------------------------------------------------------------------------------------------------------------------------------------------------------------------------------------------------|-----------------------------------------------------------------------------------------------------------------------------------------------------------------------------------------------------|-----------------------------------------------------------------------------------------------------------------------------------------------------------------------------------------------------|
| <b>CMR</b>                                           | no anomalies                                                                                                                                                                                        | delayed enhancement of the anterior septal muscle layer at the basal and middle levels of the left ventricle, indicating myocardial fibrosis                                                        | myocardial edema in the left ventricular free wall and adjacent inferior wall                                                                                                                       | myocardial edema in the left ventricular septum, anterior wall, adjacent anterior septum, and free wall                                                                                             | no anomalies                                                                                                                                                                                        |
| <b>Pathological and immunohistochemical analysis</b> | interstitial collagen fiber deposits<br>IHC:<br>CD3 (-)<br>CD4 (-)<br>CD8 (-)<br>CD9 (-)<br>CD20 (-)<br>CD68 (weekly +)<br>Masson (+)                                                               | Slight cellular hypertrophy, interstitial collagen fiber deposits<br>IHC:<br>CD3 (-)<br>CD4 (-)<br>CD8 (-)<br>CD9 (-)<br>CD20 (-)<br>CD68 (weekly +)<br>Masson (+)                                  | Slight cellular hypertrophy, IHC:<br>CD3 (-)<br>CD4 (-)<br>CD8 (-)<br>CD9 (-)<br>CD20 (-)<br>CD34 (+)<br>CD68 (weekly +)<br>Masson (+)                                                              | IHC:<br>CD3 (-)<br>CD4 (-)<br>CD8 (-)<br>CD9 (-)<br>CD20 (-)<br>CD34 (weekly +)<br>CD68 (-)<br>Masson (+)                                                                                           | Masson (+)                                                                                                                                                                                          |
| <b>Electron microscopy</b>                           | 1. local myofibrillar fibrosis<br>2. loss of integrity of myofibrillar bundles<br>3. Interstitial oedema and necrosis<br>4. lipofuscin granules accumulation<br>5. vacuolations in the mitochondria | 1. local myofibrillar fibrosis<br>2. loss of integrity of myofibrillar bundles<br>3. Interstitial oedema and necrosis<br>4. lipofuscin granules accumulation<br>5. vacuolations in the mitochondria | 1. local myofibrillar fibrosis<br>2. loss of integrity of myofibrillar bundles<br>3. Interstitial oedema and necrosis<br>4. lipofuscin granules accumulation<br>5. vacuolations in the mitochondria | 1. local myofibrillar fibrosis<br>2. loss of integrity of myofibrillar bundles<br>3. Interstitial oedema and necrosis<br>4. lipofuscin granules accumulation<br>5. vacuolations in the mitochondria | 1. local myofibrillar fibrosis<br>2. loss of integrity of myofibrillar bundles<br>3. Interstitial oedema and necrosis<br>4. lipofuscin granules accumulation<br>5. vacuolations in the mitochondria |

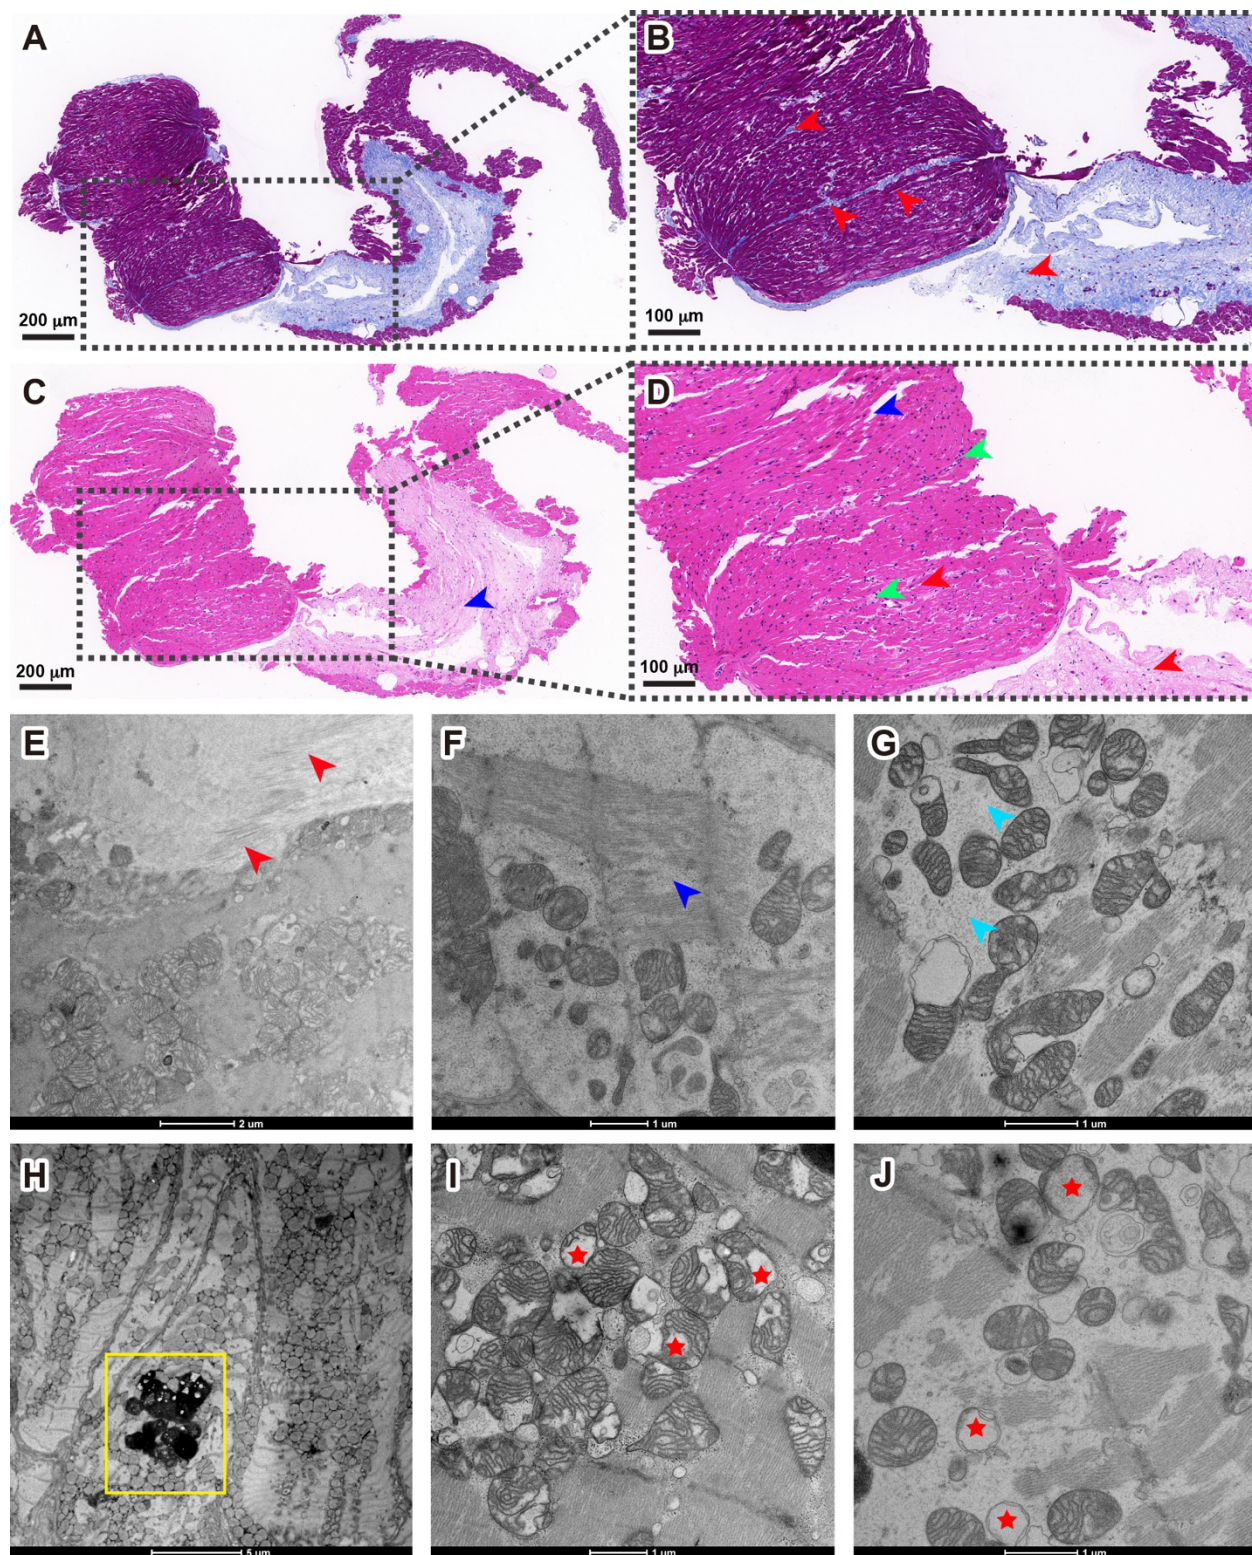

190

191

192 **Figure 2. Spectrum of myocarditis in COVID-19 Patient #2.**

- 193 (A) Masson's trichrome staining.
- 194 (B) zoomed view displayed interstitial collagen fiber deposits (red arrowheads).
- 195 (C) HE analysis shows an abnormal structure in the myocardium;
- 196 (D) zoomed view, shows interstitial collagen fiber accumulation (red arrowheads), loss of
- 197 integrity of myofibrillar bundles (blue arrowheads), and myofibrillar interstitial infiltration
- 198 with inflammatory cells is also observed (green arrowheads).
- 199 (E) electron micrographs of the biopsy sample from the patient, showing local myofibrillar
- 200 fibrosis and proliferation of fibroblasts (red arrowheads);
- 201 (F) loss of integrity of myofibrillar bundles (blue arrowheads);
- 202 (G) necrosis of myofibrillar bundles (cyan arrowheads);
- 203 (H) lipofuscin granules in the cardiomyocytes (yellow frames);
- 204 (I) and (J) a significant amount of vacuolations in the mitochondria (red stars).
- 205

206 **Ultrastructural disorder in cardiomyocytes in three patients diagnosed with**  
207 **myocarditis**

208 Patient #3 is a 40's male who recovered from COVID-19 two months prior to admission.  
209 This patient does not have any chronic diseases but presented with symptoms of fever  
210 and chest tightness. Pathogenetic tests, including SARS-CoV-2 and coxsackievirus, were  
211 shown to be negative. ECG suggested sinus tachycardia, elevated ST segments in leads  
212 II, III, avF, V5, and V6, as well as abnormal Q waves in III and avF leads. Cardiac enzyme  
213 markers, including cTnT, myoglobin, creatine kinase isoenzyme MB (CK-MB), and N-  
214 terminal pro-brain natriuretic peptide (NT-pro BNP), were all significantly elevated,  
215 indicating myocardial injury. CMR confirmed acute myocarditis, primarily affecting the left  
216 ventricular free wall and the proximal region of the inferior wall. A small amount of  
217 pericardial effusion and impaired left ventricular systolic function were also observed.  
218 Other imaging tests, including chest CT, Echo, and CAG, did not reveal significant  
219 abnormalities.

220  
221 Patient #4 is a 70's male who recovered from COVID-19 two and a half months before  
222 being admitted to our hospital. He does not have any chronic diseases but presented with  
223 symptoms of chest tightness and dyspnea. ECG revealed sinus rhythm, frequent  
224 ventricular premature beats, frequent atrial premature beats, atrial fibrillation, and ST-  
225 segment depression. Cardiac enzyme NT-pro BNP levels were elevated. CMR indicated  
226 myocardial edema in the left ventricular septum, anterior wall, adjacent anterior septum,  
227 and free wall, suggesting myocarditis. Additional imaging tests revealed no significant  
228 abnormalities.



229

230 Patient #5 is a 30's male who recovered from COVID-19 three months prior to admission.  
231 He experienced chest pain, along with elevated cardiac enzyme markers and an  
232 increased C-reactive protein (CRP) level. Imaging tests, including ECG, CMR, Echo,  
233 chest CT, and CAG, did not indicate significant changes, suggesting a subclinical  
234 presentation of myocarditis.

235

236 All three patients were diagnosed with myocarditis based on clinical presentation,  
237 elevated cardiac markers, and CMR findings. Endomyocardial biopsies conducted at  
238 various intervals post-COVID-19 infection revealed interstitial collagen deposits,  
239 lipofuscin granules accumulation, loss of integrity and necrosis of myofibrillar bundles,  
240 and notably, mitochondrial ultrastructural disorders similar to patients #1 and #2,  
241 reinforcing the diagnosis of myocarditis (**Figure 3** and **Figure S3**).

242

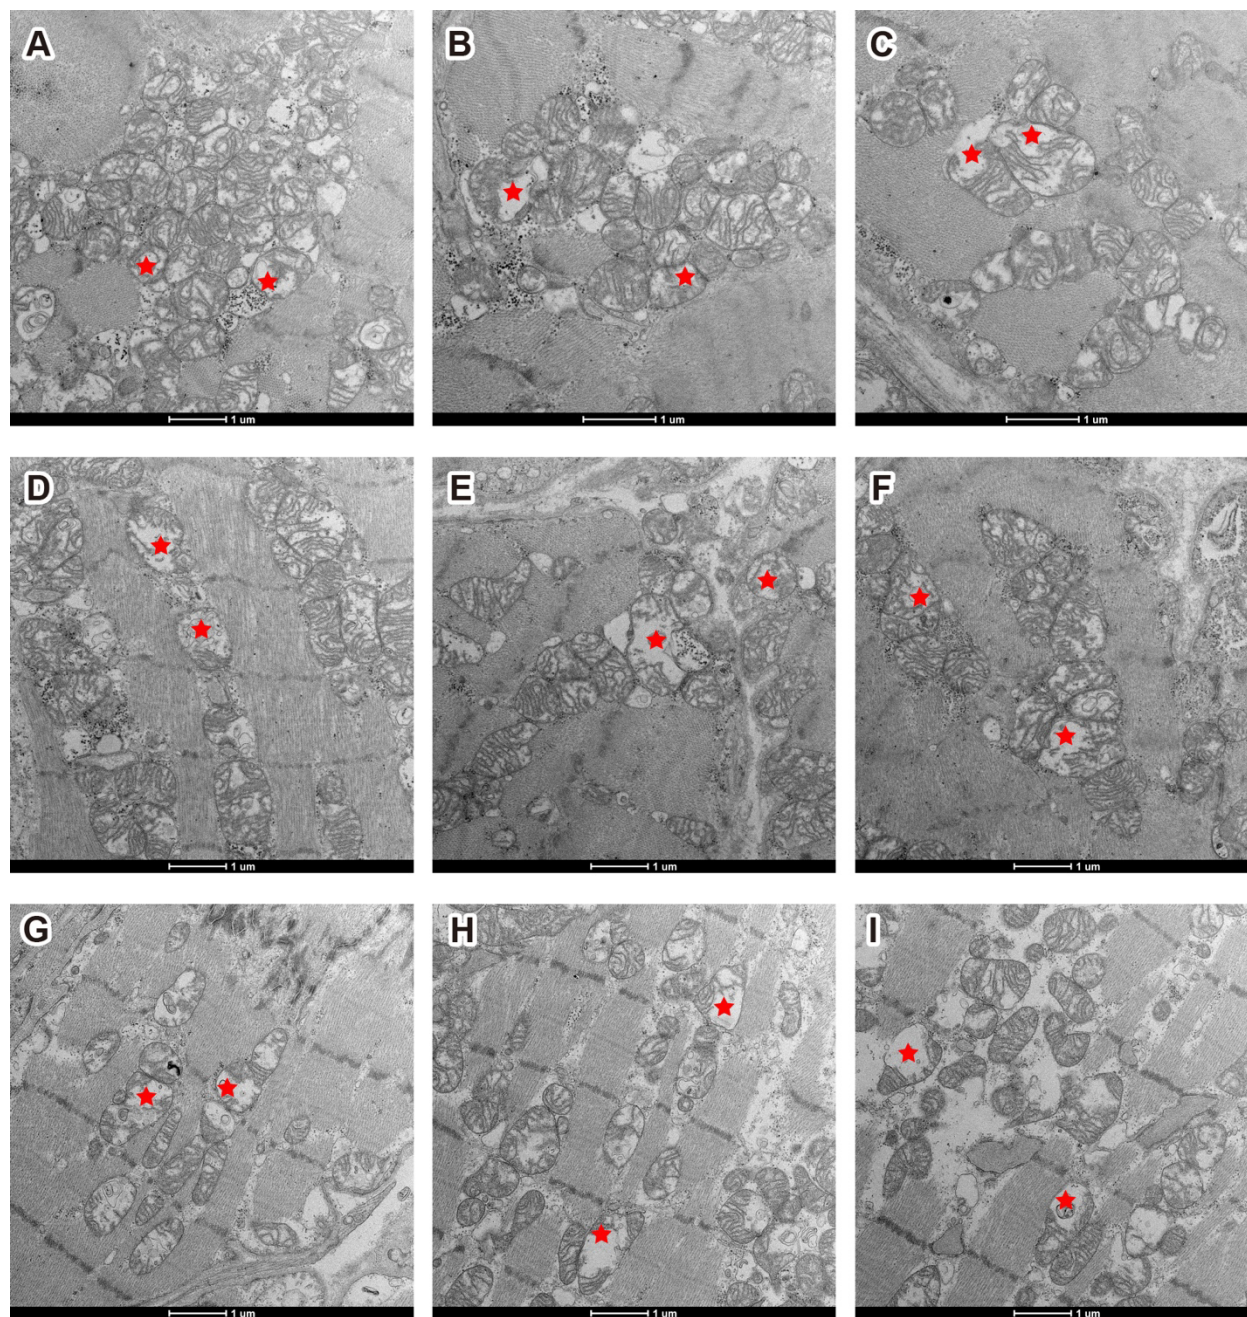

243

244

245 **Figure 3. Mitochondria disorders in COVID-19 patient #3, #4, and #5.**

246 (A)-(C) patient #3.

247 (D)-(F) patient #4.

248 (G)-(I), patient #5.

249 **Qualitative and quantitative analysis of mitochondria disorder in 2D images and 3D**  
250 **volumes**

251 We conducted a qualitative analysis of mitochondria disorder rate in the myocardial  
252 biopsy samples obtained from five patients. Forty cardiomyocytes from each patient were  
253 randomly picked, with approximately 80-100 mitochondria in each cardiomyocyte were  
254 selected for analysis. We classified them into two groups: healthy or disordered  
255 mitochondria, and the percentage of the disordered mitochondria rate was calculated for  
256 each cardiomyocyte. As shown in **Figure 4A**, the proportions of disordered mitochondria  
257 relative to the total number of mitochondria are approximately 40-60% for all five patients.  
258 This suggests that there is no significant difference in the extent of mitochondrial damage  
259 between what we speculated as longer recovery periods (e.g., 76 days and 85 days) and  
260 shorter recovery periods (e.g., 37 days and 38 days). It should be noted that the results  
261 in **Figure 4A** did not account for various influencing factors such as patient age, pre-  
262 existing health conditions before contracting COVID-19, and the presence of any  
263 underlying diseases.

264  
265 Next, we performed segmentation of the outer mitochondrial membrane (OMM), inner  
266 mitochondrial membrane (IMM), and cristae in 2D electron microscope images. **Figures**  
267 **4B** and **4C** display segmentation marks for a healthy mitochondrion and a disordered  
268 mitochondrion, respectively. We measured the length of the entire cristae (the inner  
269 boundary membrane plus the cristae membranes) and calculated the ratio of entire  
270 cristae length to the area of the mitochondrial cross section ( $L_{CRIS}/A_{MITO}$ ), termed “crista  
271 density”, measured in 2D images (Adams et al., 2023). This ratio quantifies the degree of

272 damage to the mitochondrial cristae structure. As shown in **Figure 4D**, the more severe  
273 the structural damage to the mitochondria, the more pronounced the cristae loss, resulting  
274 in a diminished length of the cristae membrane and a reduced ratio of  $L_{CRIS}/A_{MITO}$ . Our  
275 data showed that this ratio in healthy human mitochondria is around  $29 \mu\text{m}^{-1}$ , as depicted  
276 by open circles in top portion in **Figure 4D**. In contrast, the ratio dramatically decreased  
277 in the disordered mitochondria, and in the worst-case scenario, almost cristae  
278 membranes had vanished in the vacuolar mitochondria, and the ratio drops close to  $10$   
279  $\mu\text{m}^{-1}$  (filled circles in lower portion in **Figure 4D**). Previous studies have reported that  
280  $L_{CRIS}/A_{MITO}$  ratios varying from 34, 37, to  $41 \mu\text{m}^{-1}$  in rat myocardial cells (Adams *et al.*,  
281 2023; El'darov *et al.*, 2015; Mall *et al.*, 1980), which are slightly higher than those we  
282 measured in human cardiomyocytes.

283

284 We further analysis the mitochondria disorder in 3D volumes by focused ion beam  
285 scanning electron microscopy (FIB-SEM)(Kizilyaprak *et al.*, 2019), one of the 3D volume  
286 electron microscopy techniques that is promised to have an outsized impact on science  
287 in the coming years (Eisenstein, 2023; Peddie *et al.*, 2022). As shown in **Movie S1**, a  
288 tissue fragment from Patient #1 was analyzed by FIB-SEM, a gallium FIB was used to  
289 shave 10nm thin section from the tissue fragment followed by SEM imaging (pixel size  
290 5nm, in X-Y panel), 930 serial images were binned (convert X-Y pixel size to 10nm to  
291 make 10nm isotropic resolution in X-Y-Z direction), aligned, cropped (remove misaligned  
292 edges), and stacked to form a 3D volume measuring  $16\mu\text{m}\times 12\mu\text{m}\times 9.3\mu\text{m}$  in X-Y-Z  
293 dimensions.

294

295 Next, OMM, IMM, and cristae membrane of each mitochondrion were segmented using  
296 a deep learning-based MitoStructSeg platform (Wang et al., 2024), which employs an  
297 Adaptive Multi-Domain Mitochondrial Segmentation (AMM-Seg) model specifically  
298 developed to accurately segment OMM, IMM, and cristae membranes of mitochondria.  
299 As shown in **Movie S2**, a volume block was selected from a FIB-SEM raw dataset  
300 ( $4\mu\text{m}\times 4\mu\text{m}$ , 40 serial images) and displayed in two-channel: raw images and AI-based  
301 segmentation images. The raw image is initially submitted to AMM-Seg, where it  
302 undergoes rigorous data preprocessing to yield an augmented image and a textured  
303 image. Subsequently, the encoder precisely extracts the distinctive features from both the  
304 augmented and textured images. The adaptive fusion module then ingeniously integrates  
305 these two feature sets to create an enhanced and comprehensive feature representation.  
306 Finally, the decoder utilizes the enhanced representation to generate the mitochondrial  
307 segmentation results, including OMM, IMM and cristae membranes.

308  
309 **Movie S3** displayed a tissue block that enriched with mitochondria, measuring  
310  $4\mu\text{m}\times 4\mu\text{m}\times 9\mu\text{m}$ , with all mitochondria were automatically segmented in the block. We  
311 classified them into two groups: healthy (shown in green, a selection criterion was that no  
312 cristae damage was observed in any section of the 3D volume) and disordered (shown in  
313 red). The percentage of the disordered mitochondria rate was calculated. Twenty blocks  
314 from each of the five patients were analyzed, with approximately 80-100 mitochondria in  
315 each block were selected for analysis. **Figure 4E** indicated that the proportion of  
316 disordered mitochondria rate is approximately 60-90% for all five patients, more severe

317 than those analyzed in 2D images (**Figure 4A**). This indicated that mitochondria disorder  
318 rates measured in 3D volume are more accurate than those measured in 2D images.

319  
320 **Figure 4F** and **4G** illustrated 3D visualization of OMM, IMM, and cristae in a healthy  
321 mitochondrion and a disordered mitochondrion, respectively. We quantified crista density  
322 in 3D volumes by measure the surface area of the entire cristae contained within a  
323 mitochondrial volume ( $S_{\text{CRIS}}/V_{\text{MITO}}$ ). **Figure 4H** indicated that ratios in healthy human  
324 mitochondria are around  $28 \mu\text{m}^{-1}$  (depicted as open circles in top portion in **Figure 4H**).  
325 In contrast, the ratio decreased in the disordered mitochondria (filled circles in lower  
326 portion in **Figure 4H**). The crista density ratios quantified in 3D volumes as  $S_{\text{CRIS}}/V_{\text{MITO}}$   
327 are consistent with  $L_{\text{CRIS}}/A_{\text{MITO}}$  ratios quantified in 2D images (**Figure 4D**).

328

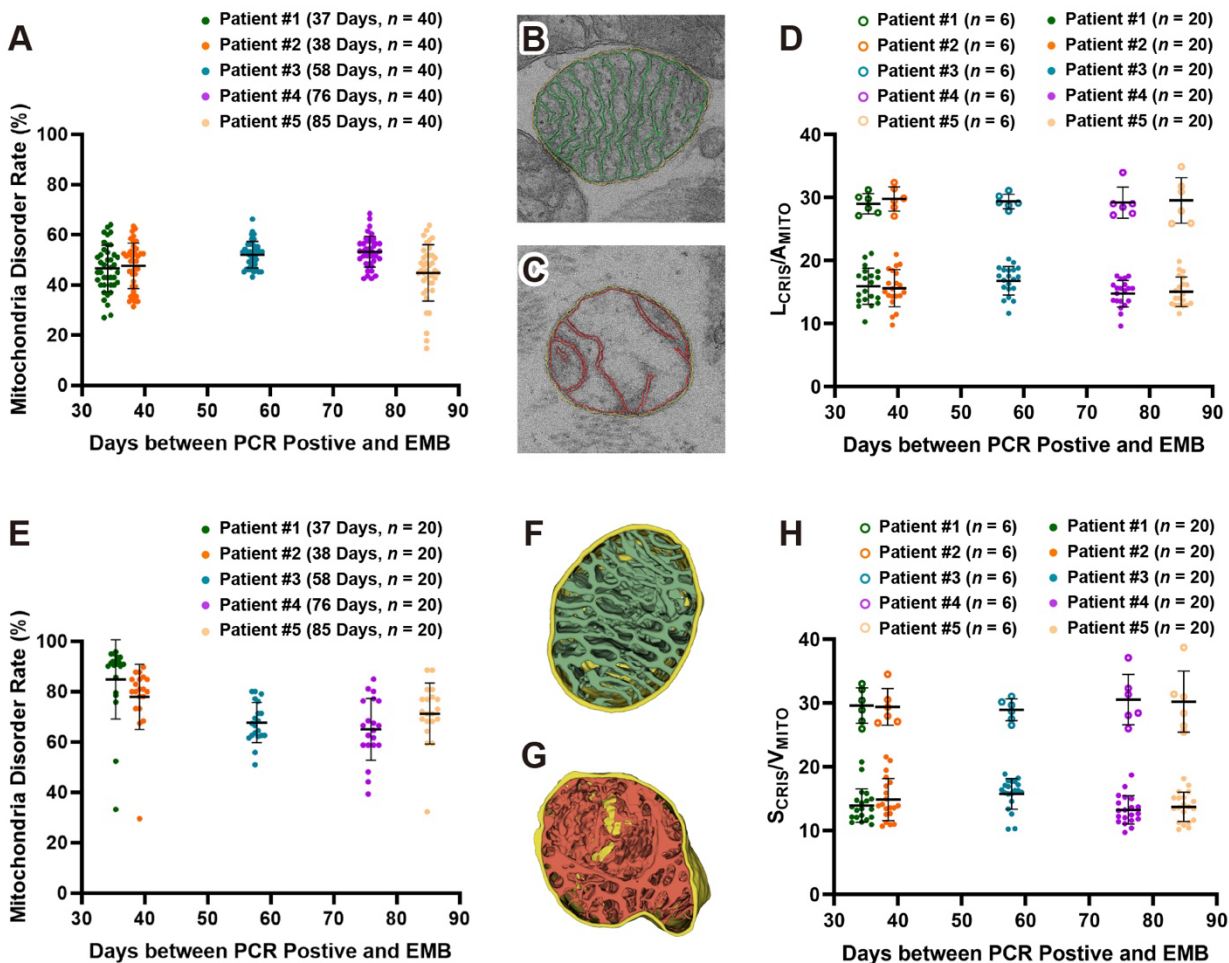

329

330

331 **Figure 4. Qualitative and quantitative analysis of mitochondria disorder in 2D**

332 **images and 3D volumes**

333 (A) analysis of mitochondria disorder rate in 40 cardiomyocytes from each patient, each  
 334 point represents an averaged percentile of disordered mitochondria from total 80-100  
 335 mitochondria in each cardiomyocyte.

336 (B) and (C) 2D segmentation of outer membrane, inner membrane, and cristae in a  
 337 healthy and disordered mitochondrion, respectively.

338 (D) analysis of mitochondria disorder by comparison the ratio of entire cristae length to  
 339 the area of the mitochondrial cross section ( $L_{CRIS}/A_{MITO}$ ). Healthy mitochondria like the

340 one shown in Panel B have an averaged ratio around  $29 \mu\text{m}^{-1}$  (open circles in top portion  
341 of Panel D). In contrast, disordered mitochondria like the one shown in Panel C have a  
342 lower ratio (filled circles in lower portion of Panel D).

343 (E) analysis of mitochondria disorder rate in 20 tissue blocks from each patient, each point  
344 represents an averaged percentile of disordered mitochondria from total 80-100  
345 mitochondria in each block.

346 (F) and (G) 3D segmentation of outer membrane, inner membrane, and cristae in a  
347 healthy and disordered mitochondrion, respectively.

348 (H) analysis of mitochondria disorder by comparison the ratio of surface area of the entire  
349 cristae contained within a mitochondrial volume ( $S_{\text{CRIS}}/V_{\text{MITO}}$ ). Healthy mitochondria like  
350 the one shown in Panel F have an averaged ratio around  $27 \mu\text{m}^{-1}$  (open circles in top  
351 portion of Panel H), disordered mitochondria like the one shown in Panel G have lower  
352 ratios (filled circles in lower portion of Panel H).

353



354 **Similar mitochondria disorganization found in SARS-CoV-2 Omicron infected mice**

355 We hypothesized the ultrastructural disorders observed in the cardiomyocytes of patients  
356 were caused by SARS-CoV-2 infection. Due to limited resource for endomyocardial  
357 biopsy samples and the lack of healthy controls, we investigated these ultrastructural  
358 disorders using mice infected with SARS-CoV-2. According to a recent assessment of the  
359 diversity of Omicron sublineages and the epidemiologic features of the autumn/winter  
360 2022 COVID-19 wave in Shanghai, BA.5.2 and BQ.1 are the two dominating sublineages  
361 (Lu et al., 2023). In our animal study, BALB/c mice were challenged with Omicron BA.5.2  
362 and BQ.1 sublineages, heart tissues were collected 7 days post infection (dpi,  
363 convalescence stage for mouse infection).

364  
365 We observed similar disorganization in mitochondria and in myofibrillar bundles in heart  
366 tissues of both BA.5.2 and BQ.1 infected mice (4 mice in each group, **Figure 5A** and **5B**).  
367 In contrast, the control mice showed normal mitochondrial ultrastructure (**Figure 5C**). The  
368 structural alterations in mitochondria are consistent with findings in murine models of viral  
369 myocarditis (Helluy et al., 2017; Zhang et al., 2020). However, we did not observe any  
370 collagen fiber or lipofuscin granule in the mice heart.

371  
372 Furthermore, we analyzed the mitochondria disorder rate and cristae density ratio in 2D  
373 images, **Figures 5D** exhibits that the mitochondria disordered rates are round 60-75%  
374 in both BA.5.2 and BQ.1 infected mice, whereas no disordered mitochondria were found  
375 in the mock group. **Figures 5E-5G** indicate that cristae density  $L_{CRIS}/A_{MITO}$  ratio in healthy  
376 human mitochondria is around  $32 \mu\text{m}^{-1}$ . In contrast, the rates in disordered mitochondria,

377 markedly decreased to 9-15  $\mu\text{m}^{-1}$ , indicating a significant loss of cristae ultrastructure in  
378 both BA.5.2 and BQ.1 infected cardiomyocytes.

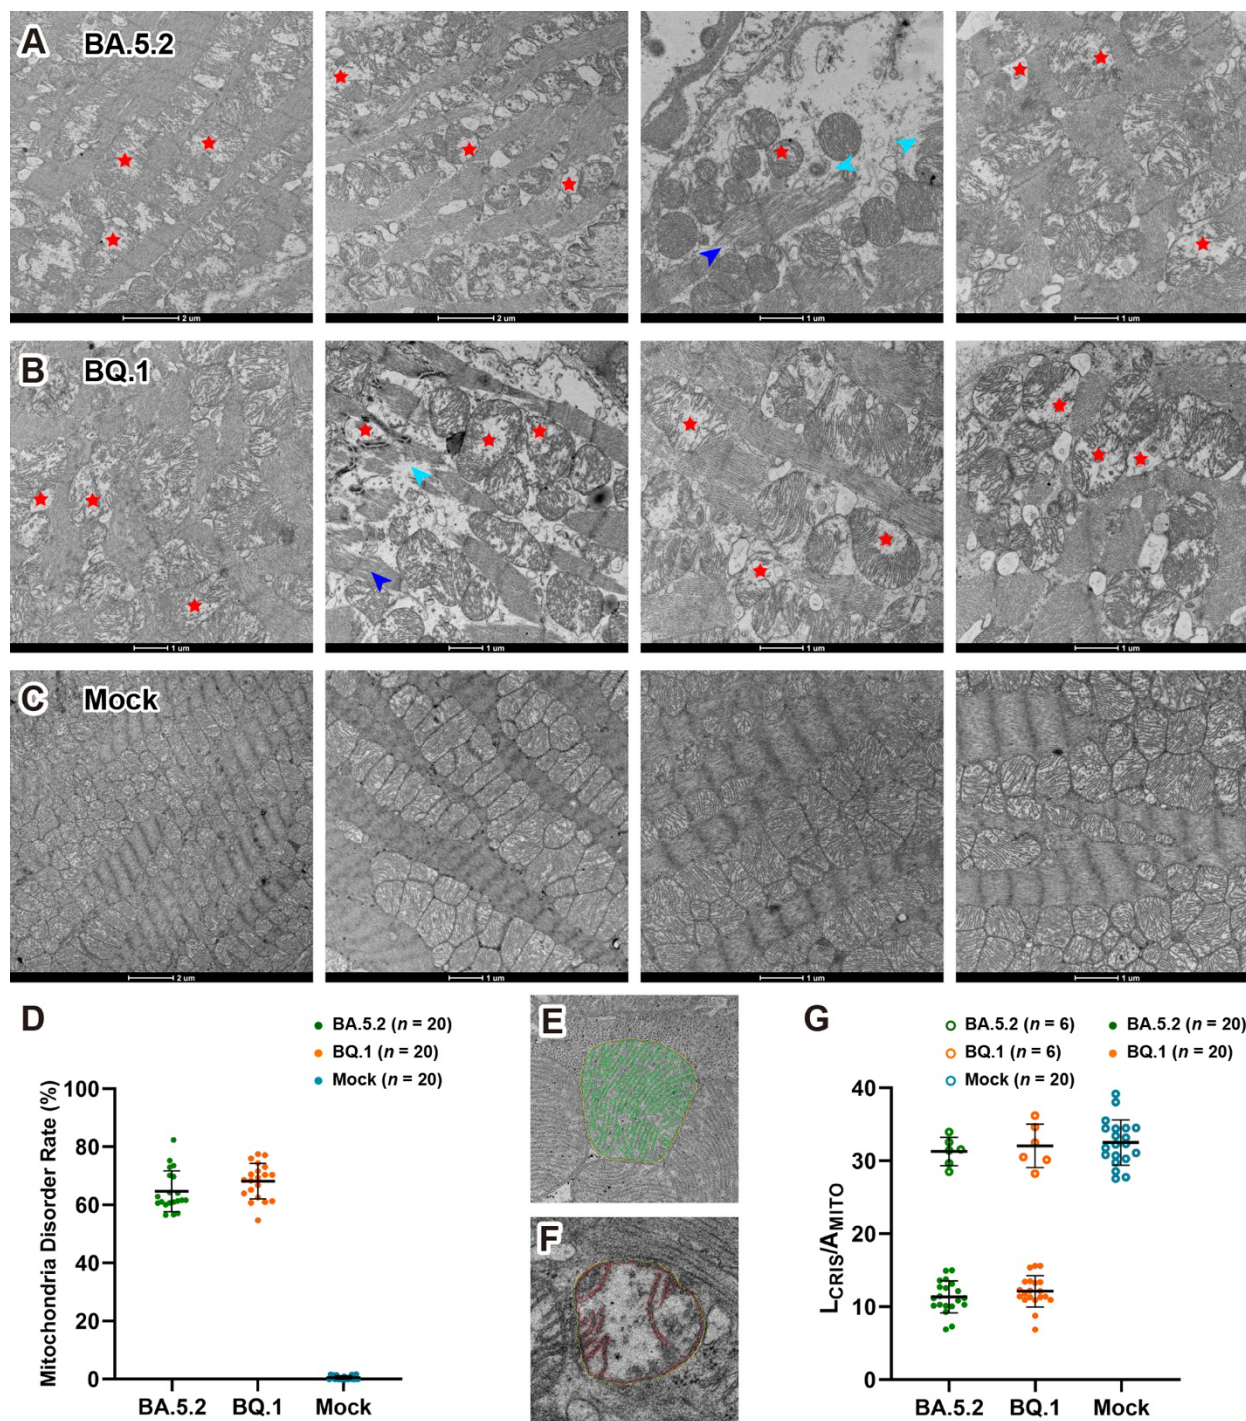

379

380 **Figure 5. Mitochondria disorganization in SARS-CoV-2 infected mice.**

381 (A) and (B), electron micrographs of heart tissue from BA.5.2 and BQ.1 infected mice,  
382 showing similar disorder (red stars) in the mitochondria and myofibrillar bundles (blue and  
383 cyan arrowheads), as observed in the biopsy tissue from the patient.

384 (C) electron micrographs of heart tissue from control group, showing normal mitochondria  
385 ultrastructure.

386 (D) analysis of mitochondria disorder rate in 20 cardiomyocytes from each mouse, each  
387 point represents an averaged percentile of disordered mitochondria from total 80-100  
388 mitochondria in each cardiomyocyte.

389 (E) and (F) 2D segmentation of outer membrane, inner membrane, and cristae in a  
390 healthy and disordered mitochondrion, respectively.

391 (G) analysis of mitochondria disorder by comparison the ratio of entire cristae length to  
392 the area of the mitochondrial cross section ( $L_{CRIS}/A_{MITO}$ ). Healthy mitochondria like the  
393 one shown in Panel E have an averaged ratio around  $30 \mu\text{m}^{-1}$  (open circles in top portion  
394 of Panel G). In contrast, disordered mitochondria like the one shown in Panel F have a  
395 lower ratio (filled circles in lower portion of Panel G).

396

397 **Proteomic profiling of SARS-CoV-2 infected mouse heart tissues**

398 We performed quantitative mass spectrometry analysis of heart tissues from BA.5.2 and  
399 BQ.1 infected mice, as well as from a mock group ( $n=4$ , **Figure 6**). Specifically, when  
400 comparing the BA.5.2 group to the mock group, 36 differentially expressed proteins  
401 (DEPs) were significantly upregulated, and 41 DEPs were significantly downregulated  
402 (**Figures 6A** and **6B**). When comparing the BQ.1 group to the mock group, 109 DEPs  
403 were significantly upregulated, and 10 DEPs were significantly downregulated (**Figures**  
404 **6C** and **6D**). To explore the potential functions of these differentially expressed proteins,  
405 we conducted Kyoto Encyclopedia of Genes and Genomes (KEGG) pathway enrichment  
406 and found functional overlaps between BA.5.2 and BQ.1. The enriched KEGG pathways  
407 of DEPs in were involved in oxidative phosphorylation, cardiac muscle contraction, and  
408 mitophagy (**Figures 6E** and **6F**).

409

410 Further functional enrichment analysis indicated that the most significantly changed  
411 genes and proteins in BA.5.2 and BQ.1 infected heart were related to mitochondria  
412 (**Figure 6G**), including mitochondrial protein transports (mitochondrial import receptors  
413 TOM40 and TOM20, mitochondrial import inner membrane translocase TIM13, and  
414 Slc25a31 ADP/ATP translocase); maintenance of mitochondria (Sorting and assembly  
415 machinery component Samm50, dehydrogenase Hsd17b10, Protein Mpv17,  
416 Deoxyguanosine kinase Dgouk, Prohibitin 1, and mitochondria protin/calcium exchanger  
417 Letm1); oxidative phosphorylation (cytochrome c oxidases, cytochrome bc1 complex, and  
418 NADH dehydrogenases); and cellular self-protection (mitochondrial thioredoxin reductase  
419 2 and mitochondrial aldehyde dehydrogenase). Most proteins related to mitochondria are

420 upregulated, likely compensating for protein lost, damage repair, and the generation of  
421 new mitochondria.

422

423 *Mitochondrial protein transports* (1). TOM40: Most mitochondrial proteins are  
424 synthesized as precursors in the cytosol and imported by the translocase of the outer  
425 mitochondrial membrane (TOM). The  $\beta$ -barrel protein TOM40 forms the protein-  
426 conducting channel of the TOM complex and acts as the central porin of TOM complex  
427 to import of precursor proteins into the inter-OMM-IMM space (Dolezal et al., 2006).  
428 Consequently, deficits in TOM40 adversely affect preprotein import, disrupting  
429 mitochondrial homeostasis and cell viability (Baker et al., 1990) and arresting animal  
430 growth (Billing et al., 2011). On the other hand, over-expression of TOM40 is associated  
431 with elevated mitochondrial membrane potentials, respiratory rates, cellular ATP levels,  
432 suggesting that increased protein level of TOM40 may be protective of mitochondrial  
433 function (Zeitlow et al., 2017). (2). TOM20 is an OMM protein that functions as a  
434 component of the TOM complex. The primary role of TOM20 is receptor recognition,  
435 targeting mitochondrial precursor proteins and guiding them to TOM40 for protein  
436 translocation (Endo and Kohda, 2002). Tom20 depletion is known to induce a grossly  
437 altered morphology of mitochondria, Tom20-deficient fungi contain mitochondria that are  
438 highly deficient in cristae ultrastructure (Harkness et al., 1994). The lack of cristae in  
439 TOM20-deficient mitochondria is similar to what we observed in human and mouse  
440 cardiomyocytes post SARS-CoV-2 infection. It remains unclear if SARS-CoV-2 affects  
441 TOM40 and TOM20, nevertheless, a recent study revealed that the ORF9b protein of  
442 both SARS-CoV and SARS-CoV-2 physically interacts with TOM70, a partner of TOM20

443 that also recognizes and transfers mitochondrial preproteins to TOM40, and that the  
444 expression level of TOM70 was found decreased during SARS-CoV-2 infection (Gordon  
445 et al., 2020). (3). TIM13 is a member of translocase of the inner mitochondrial membrane  
446 (TIM) family of chaperones, TIM13 functions in the inter-OMM-IMM space to shield  
447 unfolded, hydrophobic membrane proteins and maintain an import-competent state for  
448 downstream translocation (Beverly et al., 2008; Koehler, 2004). Additionally, a recent  
449 study demonstrated that TIM13 is closely related to fibrosis in liver disease, silencing  
450 TIM13 significantly reduced the expression of profibrogenic genes and apoptosis related  
451 genes, although the underlying mechanism has yet to be fully elucidated (Liao et al.,  
452 2023). (4). Slc25a31 is a member of the ADP/ATP carrier family of proteins that exchange  
453 cytosolic ADP for matrix ATP in the mitochondria. Over-expressing of Slc25a31 has been  
454 shown to display an anti-apoptotic phenotype (Gallerne et al., 2010).

455  
456 *Maintenance of mitochondria* (1). Samm50 is the core component of the sorting and  
457 assembly machinery (SAM) that plays a key role in the OMM, and it has been confirmed  
458 that Samm50 promotes the biogenesis of TOM40 by forming a SAM-TOM super-complex,  
459 and Samm50 deficiency inhibits the assemble of TOM40 (Humphries et al., 2005; Qiu et  
460 al., 2013). This disruption can lead to impaired mitochondrial biogenesis and maintenance,  
461 resulting in decreased mitochondrial function and altered energy metabolism. Studies  
462 have shown that reduced expression of Samm50 leads to the development of myocardial  
463 hypertrophy and associated mitochondrial dysfunctions, including impaired mitophagy  
464 and increased oxidative stress in mouse ventricular cardiomyocytes (Xu et al., 2021).  
465 Moreover, Samm50 physically interacts with Mitofilin and CHCHD6, two core proteins of

466 the mitochondrial contact site and cristae organizing system (MICOS) complex in the  
467 junction of IMM and cristae, Samm50 is indispensable for cristae structure stability and  
468 the proper assembly of the mitochondrial respiratory chain complexes (Ding et al., 2015).  
469 Depletion of Samm50 leads to changes in mitochondrial shape and the loss of  
470 mitochondrial cristae (Ott et al., 2015; Ott et al., 2012). (2). Hsd17b10 encodes 3-  
471 hydroxyacyl-CoA dehydrogenase type-2, a member of the short chain  
472 dehydrogenase/reductase superfamily. This mitochondrial protein is involved in pathways  
473 of fatty acid, branched chain amino acid and steroid metabolism and has been reported  
474 to be associated with mitochondrial toxicity in neurodegenerative diseases (Lustbader et  
475 al., 2004). Loss of Hsd17b10 function mediated by gene mutation, knock-down, or knock-  
476 out causes mitochondrial dysfunction and apoptotic cell death. Moreover, EM analysis of  
477 mitochondria from *Xenopus* embryos, mouse brain, and human fibroblasts showed that  
478 Hsd17b10 protein is required for structural and functional integrity of mitochondria  
479 (Rauschenberger et al., 2010). (3). MPV17 is an IMM protein and its deficiency can cause  
480 mitochondrial DNA (mtDNA) depletion, increase reactive oxygen species (ROS), and  
481 promote mitochondrial apoptosis (Dalla Rosa et al., 2016; Zwacka et al., 1994). Moreover,  
482 Electron microscopy examination observed broken or disappearance of cristae in MPV17  
483 knock-out zebrafish and mice, and in Sym1 (yeast ortholog of MPV17) ablation yeast  
484 (Bian et al., 2021; Dallabona et al., 2010; Viscomi et al., 2009). (4). *DGUOK* gene  
485 encodes mitochondrial deoxyguanosine kinase, which mediates phosphorylation of  
486 purine deoxyribonucleosides in the matrix. DGUOK is crucial for the maintenance and  
487 replication of mtDNA (Petrakis et al., 1999). DGUOK deficiency leads to mtDNA depletion  
488 syndrome (MDS), which results in reduced mtDNA content and decreased activity of the

489 mtDNA-encoded respiratory chain complexes I, III, IV, and V (Taanman et al., 1997). The  
490 depletion impairs the mitochondrial respiratory chain function, leading to decreased ATP  
491 production and increased production of ROS. The resulting oxidative stress further  
492 damages mitochondrial components, exacerbating the dysfunction. DGUOK-related MDS  
493 is characterized by structural abnormalities in mitochondria, such as loss of cristae  
494 integrity and swollen mitochondria (Lee et al., 2009; Mandel et al., 2001). (5). Prohibitin  
495 1 (PHB1), along with its homolog PHB2, forms a large complex in the IMM that is essential  
496 for maintaining mitochondrial integrity and functionality, Prohibitins are involved in  
497 regulating mitochondrial dynamics, including processes of fusion and fission which are  
498 crucial for mitochondrial adaptation under stress conditions; Prohibitins function as  
499 chaperone proteins that stabilizes mitochondrial respiratory enzymes and maintains  
500 mitochondrial integrity in the IMM and cristae (Signorile et al., 2019). When Prohibitins  
501 are deficient, there is a disruption in these dynamics, leading to impaired mitochondrial  
502 division and fusion, affecting the mitochondrial membrane potential and results in an  
503 aberrant cristae morphogenesis (Merkwirth et al., 2008). Over-expression of Prohibitin 1  
504 in cardiomyocytes has been shown to protect cells from oxidative stress-induced  
505 mitochondrial membrane permeability, inhibited release of cytochrome c, and suppressed  
506 mitochondrial apoptosis (Liu et al., 2009). Additionally, mitochondrial shape and  
507 ultrastructure are affected by the lipid composition of mitochondria. Prohibitins affect the  
508 maturation of cardiolipin, a phospholipid of the mitochondrial inner membrane that plays  
509 a role in mitochondrial fusion (Richter-Dennerlein et al., 2014). (6). Letm1 is a  
510 mitochondria protin/calcium exchanger localized to the IMM (Jiang et al., 2009). Letm1  
511 maintains the mitochondrial tubular shapes and is required for normal mitochondrial



512 morphology and cellular viability, LETM1 downregulation cause mitochondrial swelling  
513 and cristae disorganization, formation of the respiratory chain complexes are also  
514 impaired by LETM1 knockdown (Tamai et al., 2008).

515

516 *Oxidative phosphorylation* Multiple genes and proteins involve in cytochrome c oxidase,  
517 cytochrome bc1 complex, and NADH dehydrogenas. NADH dehydrogenas known as  
518 Complex I, Cytochrome bc1 complex as Complex III, and cytochrome c oxidase as  
519 Complex IV of the mitochondrial electron transport chain. They are the enzymes of the  
520 mitochondria electron transport chain and play crucial roles in cellular energy production,  
521 the process is essential for maintaining the proton gradient that drives ATP synthesis.  
522 Impairment of NADH dehydrogenas, cytochrome bc1 complex, and cytochrome c oxidase  
523 activities disrupt the electron transport chain, leading to reduced ATP production,  
524 increased ROS production, and impaired cellular respiration. These changes result in  
525 various structural and functional abnormalities in mitochondria, including altered  
526 mitochondrial morphology, increased mitochondrial fragmentation, and swelling  
527 (Vercellino and Sazanov, 2022).

528

529 *Cellular self-protection* (1). Gene *Txnrd2* encodes thioredoxin reductase 2, a  
530 selenocysteine-containing enzyme essential for mitochondrial oxygen radical scavenging.  
531 Thioredoxin reductase 2 is crucial for maintaining redox homeostasis within mitochondria  
532 by reducing oxidative stress (Arnér and Holmgren, 2000). Cardiac-specific deletion of  
533 *Txnrd2* in mice results in dilated cardiomyopathy, the lack of *Txnrd2* results in increased  
534 oxidative damage, disrupted mitochondrial dynamics, and impaired energy production,

535 leading to structural alterations such as mitochondrial fragmentation and loss of cristae  
536 integrity (Conrad et al., 2004). (2). Gene *Aldh2* encodes aldehyde dehydrogenase 2, an  
537 enzyme predominantly found in the mitochondrial matrix, crucial for detoxifying aldehydes  
538 generated during oxidative stress. ALDH2 deficiency leads to increased accumulation of  
539 toxic aldehydes, which impaired mitochondrial respiration, reduced ATP production, and  
540 increased ROS generation, leading to oxidative damage to mitochondrial DNA, proteins,  
541 and lipids (Wu and Ren, 2019). The lack of ALDH2 exacerbates mitochondrial structural  
542 abnormalities, including swelling and loss of cristae integrity (Kuroda et al., 2017).

543

544 Other proteins involved in fibrils formation (fibromodulin), biosynthesis and degradation  
545 (26S proteasomal subunits), as well as cardiac related proteins (natriuretic peptides A  
546 and caveolin-3), were upregulated in BA.5.2 and BQ.1 infected mice heart. One ribosomal  
547 subunit protein, Rpl3l, which inhibits myotube growth and muscle function in skeletal and  
548 cardiac muscle (Chaillou et al., 2016), was down-regulated.

549

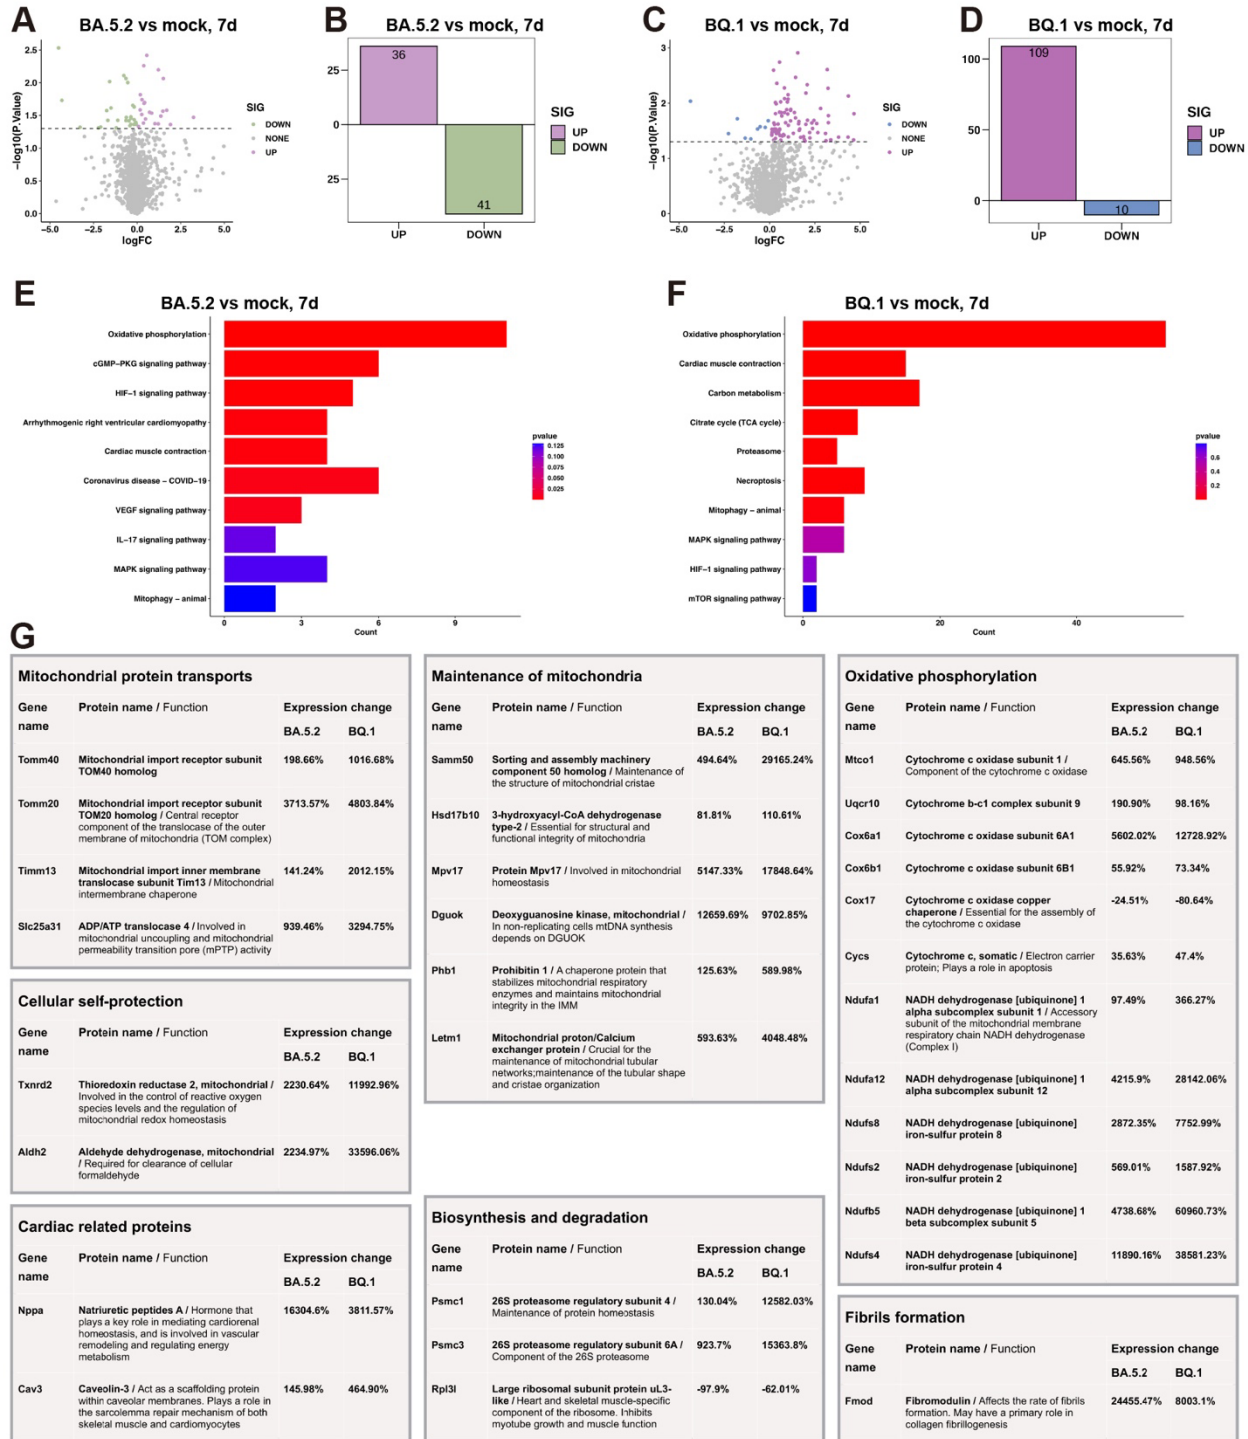

550

551

552

**Figure 6. Proteomic profiling of SARS-CoV-2 infected mouse heart tissues.**

553 (A) and (C) volcano plots representing differentially abundant proteins in BA.5.2 and BQ.1  
554 infected mice heart tissue compared with mock group (n = 4). Green and blue dots  
555 represent proteins with a log<sub>2</sub> fold change < -0.5 and a q value < 0.05. Plum and purple  
556 dots represent proteins with a log<sub>2</sub> fold change > 0.5 and a q value < 0.05. Gray dot line  
557 indicates q value = 0.05. Only proteins with >2 identified unique peptides were considered.  
558 (B) and (D), numeric quantification of colored data points in A and C.  
559 (E) and (F) KEGG pathway enrichment analysis of significantly changed proteins.  
560 (G) groups of proteins that upregulated or downregulated in BA.5.2 and BQ.1 infected  
561 mice heart, percent changes in protein level are indicated for each protein.  
562

## 563 **DISCUSSION**

564 The global COVID-19 pandemic has presented clinicians with the daunting task of  
565 diagnosing and treating patients with non-specific cardiovascular symptoms, complicated  
566 by ambiguous CMR findings. Myocarditis, characterized as an inflammatory disease of  
567 the myocardium, requires immunological and histological confirmation for diagnosis, and  
568 endomyocardial biopsy serves to gain certainty about the diagnosis and identify the  
569 potential cause of the disease. Despite Patient #1 lacking typical viral myocarditis  
570 symptoms such as chest pain and dyspnea, elevated cardiac troponin levels prompted  
571 further investigation. Following the “2022 Expert Consensus Decision Pathway on  
572 Cardiovascular Sequelae of COVID-19 in Adults: Myocarditis and Other Myocardial  
573 Involvement, Post-Acute Sequelae of SARS-CoV-2 Infection, and Return to Play” by the  
574 American College of Cardiology (Gluckman et al., 2022), we proceeded with  
575 endomyocardial biopsy, aligning with international expert consensus that published in  
576 2021 by the Heart Failure Association of the European Society of Cardiology, the Heart  
577 Failure Society of America, and the Japanese Heart Failure Society, in which  
578 endomyocardial biopsy is recommended in diagnostic assessment of select patients with  
579 atypical myocarditis (Seferović et al., 2021). In this study, immunohistochemical analysis,  
580 Masson's trichrome staining, HE staining, and electron microscopy exam were performed  
581 on the endomyocardial biopsy samples, providing precise evidences for the diagnosis of  
582 myocarditis. We encourage clinicians to consider endomyocardial biopsy following the  
583 above expert consensuses, particularly in diagnosis of long-COVID associated  
584 cardiovascular outcomes.

585

586 The presence of lipofuscin granules in cardiomyocytes, indicative of cellular damage and  
587 aging, has been historically associated with myocardial hypertrophy, heart failure, and  
588 sudden cardiac death (Kajihara et al., 1973; Kakimoto *et al.*, 2019). These granules result  
589 from the oxidation and polymerization of protein and lipid residues, often accumulating  
590 when mitochondria suffer structural damage, underscoring their significance as markers  
591 of cellular distress (Malkoff and Strehler, 1963). When mitochondria undergo structural  
592 damage, lysosomes, which are normally responsible for mitochondrial turnover,  
593 accumulate lipofuscin granules (Brunk and Terman, 2002). Our findings of mitochondrial  
594 disorganization and lipofuscin accumulation align with these observations, suggesting  
595 that SARS-CoV-2 infection contributes significantly to mitochondrial damage and  
596 accumulation of lipofuscin granules in the cardiomyocytes.

597

598 We have observed an interesting phenomenon in the mitochondria, the swollen and  
599 vacuolated mitochondria, distorted and broken cristae, all indicated severe damage to  
600 this important cellular organelle. This damage is highly likely caused by the SARS-CoV-  
601 2 Infection, as we have found an almost identical mitochondria disorganization in the mice  
602 that were infected with SARS-CoV-2. Our findings are consistent with a recent study in  
603 which mitochondrial gene expression was analyzed in autopsy tissues from patients with  
604 COVID-19, and core mitochondrial gene expression were suppressed in the hearts,  
605 chronically impaired mitochondrial function, and led to severe COVID-19 pathology in  
606 cardiovascular diseases (Guarnieri et al., 2023).

607

608 Mitochondrial damage has profound implications for cellular respiration, ATP production,  
609 and metabolism, potentially precipitating cardiovascular, neurodegenerative, and  
610 metabolic disorders. Notably, our observations indicate persistent mitochondrial damage  
611 three months post-COVID-19 recovery, challenging existing recommendations on  
612 exercise cessation post-infection. The ACC's Sports and Exercise Cardiology Council's  
613 recommendation for a minimum two-week cessation of exercise for mildly or moderately  
614 symptomatic COVID-19 athletes may need reevaluation (Phelan et al., 2020), considering  
615 our findings and prior guidance advocating for 3-6 months of exercise abstinence for  
616 individuals with clinical myocarditis (Maron et al., 2015).

617

618 This study's limitation is its reliance on five patients' data, underscoring the need for  
619 larger-scale studies to validate these findings and further elucidate the long-term  
620 cardiovascular impacts of COVID-19. Our research highlights the critical need for  
621 extended recovery periods before resuming exercise or strenuous activities post-COVID-  
622 19, based on the significant mitochondrial damage observed in cardiomyocytes.

623

## 624 **STAR METHODS**

### 625 **Clinical study**

626 Clinical study was approved by the Human Ethics Committee of Shanghai Tenth People's  
627 Hospital, Tongji University School of Medicine (Approval Number: 23KT11). Written  
628 informed consent was obtained from the patient.

629

### 630 **Endomyocardial biopsy**

631 An endomyocardial biopsy was performed to determine the cause of the patient's sudden  
632 cardiac death. Using a disposable Cordis biptome guided by fluoroscopy through the  
633 right femoral vein, six tissue fragments were obtained from the right ventricular septum.  
634 For immunohistochemical, Masson's trichrome, and HE staining, tissue samples were  
635 fixed in formalin and embedded in paraffin, 5  $\mu\text{m}$  thick sections were examined under light  
636 microscopy.

637

### 638 **Transmission electron microscopy**

639 Myocardial tissue was pre-fixed with 1% glutaraldehyde followed by 1% osmium tetroxide  
640 fixation. The tissue was dehydrated step by step using a gradient ethanol solution,  
641 followed by gradient infiltration with a mixture of acetone and Epon812 resin and resin-  
642 embedded polymerization. The resin block was cut into 70 nm ultrathin sections, double-  
643 stained with uranyl acetate and lead citrate, and the specimen was observed under  
644 transmission electron microscopy (Talos L120C G2, Thermo Fisher Scientific) operating  
645 at 120 KeV. Images were recorded with a Ceta 4K x 4K CMOS camera.

646



647 **Focused ion beam scanning electron microscopy (FIB-SEM)**

648 The resin block was observed under a dual beam scanning electron microscope (Aquilos  
649 Cryo-FIB, Thermo Fisher Scientific). Each serial face was imaged using T1 (in-lens  
650 detector) backscatter mode, with a 2.0 keV acceleration voltage and a current of 0.1 nA.  
651 The pixel size of X-Y panels was 5nm, and image dimension varied for each dataset  
652 (about 10-30 $\mu$ m). The resin block was sequentially milled by a gallium ion beam, with a  
653 Z-axis height of 10nm for each milling, and number of images varied for each dataset  
654 (about 800-1800). Images were aligned, cropped, and binned to form an image stack with  
655 10nm isotropic resolution in X-Y-Z dimension for further segmentation and analysis.

656

657 **Viruses and mice**

658 The BALB/c mice were purchased from Jinan Pengyue Experimental Animal Breeding  
659 Co. LTD. The SARS-CoV-2 variants Omicron BQ.1 and BA.5.2 were isolated from  
660 COVID-19 patients in Guangdong, China. Experiments related to authentic SARS-CoV-  
661 2 were conducted in Guangzhou Customs District Technology Center BSL-3 Laboratory.

662

663 **Animal experiments**

664 6-8 weeks old mice were challenged with  $1 \times 10^5$  FFU SARS-CoV-2 (BQ.1 and BA.5.2).  
665 Mice were challenged with phosphate-buffered saline as controls. To investigate the  
666 ultrastructure of cardiomyocytes, hearts were collected seven days after infection.  
667 Myocardial tissue from mice was prepared using the same protocol as endomyocardial  
668 biopsy tissue.

669

## 670 **Proteome analysis**

671 Mouse heart tissue was ground individually in liquid nitrogen and lysed with SDT lysis  
672 buffer, and protein concentration was determined by BCA method. Protein samples were  
673 hydrolyzed by trypsin, and desalination was conducted on the C18 desalting column, and  
674 peptides were collected and lyophilized. The peptides were dissolved and fractionated  
675 using a C18 column using a Rigol L3000 HPLC system. The eluates were separated and  
676 analyzed with an EvoSep One nano UPLC coupled to a Bruker timsTOF Pro2 mass  
677 spectrometry with a nano-electrospray ion source. The mass spectrometer adopts DDA  
678 PaSEF mode for data acquisition, and the full scan MS survey spectra range was m/z  
679 from 100 to 1700. The raw files were processed using SpectroMine software, MS spectra  
680 lists were searched against their species-level UniProt FASTA databases. Peptide  
681 identification was performed with an initial precursor mass deviation of up to 20 ppm and  
682 a fragment mass deviation of 20 ppm. Gene Ontology (GO) and InterPro (IPR) functional  
683 analysis were conducted using the interproscan program against the non-redundant  
684 protein database, and the databases of COG and KEGG were used to analyze the protein  
685 family and pathway.

686

687

## 688 **Acknowledgements**

689 This work was supported by National Natural Science Foundation of China (82070329 to  
690 ZL, 32241028 to ZL and PW, 82170521 to WC, 82170456 to YX, 82025001 to JZ,  
691 82172240 to YW, 61932018 and 32241027 to FZ, 62072441 to XW).

692

693

## 694 **Author Contributions**

695 Conceptualization, Z.L., Y.X., and W.C.; Methodology, Z.L., W.C., and Y.W.; Investigation,  
696 W.C., S.G., Y.W., X.W., B.T., H.L., J.A., M.Z., C.C., P.L., Z.Z., Y.W., X.H., X.W., J.Z., X.P.,  
697 F.Z., P.W., J.Z., Y.X., and Z.L.; Resources, Z.L., Y.X., W.C. P.W., J.Z., Y.W., X.W., F.Z.,  
698 and X.P.; Writing – Original Draft, Z.L., W.C., S.G., and Y.X; Writing – Review & Editing,  
699 Z.L.; Supervision, Z.L. and Y.X; Funding Acquisition, Z.L., W.C., Y.X., P.W., J.Z., Y.W.,  
700 X.W., and F.Z.

701

## 702 **Declaration of Interests**

703 The authors declare that they have no competing interests.

704

## 705 REFERENCES

- 706
- 707 Adams, R.A., Liu, Z., Hsieh, C., Marko, M., Lederer, W.J., Jafri, M.S., and Mannella, C.  
708 (2023). Structural Analysis of Mitochondria in Cardiomyocytes: Insights into  
709 Bioenergetics and Membrane Remodeling. *Current Issues in Molecular Biology* 45,  
710 6097-6115. 10.3390/cimb45070385.
- 711 Arnér, E.S., and Holmgren, A. (2000). Physiological functions of thioredoxin and  
712 thioredoxin reductase. *Eur J Biochem* 267, 6102-6109.
- 713 Baker, K.P., Schaniel, A., Vestweber, D., and Schatz, G. (1990). A yeast mitochondrial  
714 outer membrane protein essential for protein import and cell viability. *Nature* 348, 605-  
715 609.
- 716 Ballering, A.V., van Zon, S.K.R., Olde Hartman, T.C., and Rosmalen, J.G.M. (2022).  
717 Persistence of somatic symptoms after COVID-19 in the Netherlands: an observational  
718 cohort study. *Lancet* 400, 452-461.
- 719 Beverly, K.N., Sawaya, M.R., Schmid, E., and Koehler, C.M. (2008). The Tim8-Tim13  
720 complex has multiple substrate binding sites and binds cooperatively to Tim23. *J Mol*  
721 *Biol* 382, 1144-1156.
- 722 Bian, W.P., Pu, S.Y., Xie, S.L., Wang, C., Deng, S., Strauss, P.R., and Pei, D.S. (2021).  
723 Loss of mpv17 affected early embryonic development via mitochondria dysfunction in  
724 zebrafish. *Cell Death Discov* 7, 250.
- 725 Billing, O., Kao, G., and Naredi, P. (2011). Mitochondrial function is required for  
726 secretion of DAF-28/insulin in *C. elegans*. *PLoS One* 6, e14507.
- 727 Brunk, U.T., and Terman, A. (2002). The mitochondrial-lysosomal axis theory of aging:  
728 accumulation of damaged mitochondria as a result of imperfect autophagocytosis. *Eur J*  
729 *Biochem* 269, 1996-2002.
- 730 Chaillou, T., Zhang, X., and McCarthy, J.J. (2016). Expression of Muscle-Specific  
731 Ribosomal Protein L3-Like Impairs Myotube Growth. *J Cell Physiol* 231, 1894-1902.
- 732 Conrad, M., Jakupoglu, C., Moreno, S.G., Lippl, S., Banjac, A., Schneider, M., Beck, H.,  
733 Hatzopoulos, A.K., Just, U., Sinowatz, F., et al. (2004). Essential role for mitochondrial  
734 thioredoxin reductase in hematopoiesis, heart development, and heart function. *Mol Cell*  
735 *Biol* 24, 9414-9423.

- 736 Cunningham, K.S., Veinot, J.P., and Butany, J. (2006). An approach to endomyocardial  
737 biopsy interpretation. *J Clin Pathol* 59, 121-129.
- 738 Dalla Rosa, I., Cámara, Y., Durigon, R., Moss, C.F., Vidoni, S., Akman, G., Hunt, L.,  
739 Johnson, M.A., Grocott, S., Wang, L., et al. (2016). MPV17 Loss Causes  
740 Deoxynucleotide Insufficiency and Slow DNA Replication in Mitochondria. *PLoS Genet*  
741 12, e1005779.
- 742 Dallabona, C., Marsano, R.M., Arzuffi, P., Ghezzi, D., Mancini, P., Zeviani, M., Ferrero,  
743 I., and Donnini, C. (2010). Sym1, the yeast ortholog of the MPV17 human disease  
744 protein, is a stress-induced bioenergetic and morphogenetic mitochondrial modulator.  
745 *Hum Mol Genet* 19, 1098-1107.
- 746 Ding, C., Wu, Z., Huang, L., Wang, Y., Xue, J., Chen, S., Deng, Z., Wang, L., Song, Z.,  
747 and Chen, S. (2015). Mitofilin and CHCHD6 physically interact with Sam50 to sustain  
748 cristae structure. *Sci Rep* 5, 16064.
- 749 Dolezal, P., Likic, V., Tachezy, J., and Lithgow, T. (2006). Evolution of the molecular  
750 machines for protein import into mitochondria. *Science* 313, 314-318.
- 751 Eisenstein, M. (2023). Seven technologies to watch in 2023. *Nature* 613, 794-797.
- 752 El'darov, C.M., Vays, V.B., Vangeli, I.M., Kolosova, N.G., and Bakeeva, L.E. (2015).  
753 Morphometric Examination of Mitochondrial Ultrastructure in Aging Cardiomyocytes.  
754 *Biochemistry (Mosc)* 80, 604-609.
- 755 Endo, T., and Kohda, D. (2002). Functions of outer membrane receptors in  
756 mitochondrial protein import. *Biochim Biophys Acta* 1592, 3-14.
- 757 Gallerne, C., Touat, Z., Chen, Z.X., Martel, C., Mayola, E., Sharaf el dein, O., Buron, N.,  
758 Le Bras, M., Jacotot, E., Borgne-Sanchez, A., et al. (2010). The fourth isoform of the  
759 adenine nucleotide translocator inhibits mitochondrial apoptosis in cancer cells. *Int J*  
760 *Biochem Cell Biol* 42, 623-629.
- 761 Gluckman, T.J., Bhave, N.M., Allen, L.A., Chung, E.H., Spatz, E.S., Ammirati, E.,  
762 Baggish, A.L., Bozkurt, B., Cornwell, W.K., 3rd, Harmon, K.G., et al. (2022). 2022 ACC  
763 Expert Consensus Decision Pathway on Cardiovascular Sequelae of COVID-19 in  
764 Adults: Myocarditis and Other Myocardial Involvement, Post-Acute Sequelae of SARS-  
765 CoV-2 Infection, and Return to Play: A Report of the American College of Cardiology  
766 Solution Set Oversight Committee. *J Am Coll Cardiol* 79, 1717-1756.
- 767 Gordon, D.E., Hiatt, J., Bouhaddou, M., Rezelj, V.V., Ulferts, S., Braberg, H., Jureka,  
768 A.S., Obernier, K., Guo, J.Z., Batra, J., et al. (2020). Comparative host-coronavirus

- 769 protein interaction networks reveal pan-viral disease mechanisms. *Science* 370,  
770 eabe9403.
- 771 Guarnieri, J.W., Dybas, J.M., Fazelinia, H., Kim, M.S., Frere, J., Zhang, Y., Soto  
772 Albrecht, Y., Murdock, D.G., Angelin, A., Singh, L.N., et al. (2023). Core mitochondrial  
773 genes are down-regulated during SARS-CoV-2 infection of rodent and human hosts. *Sci*  
774 *Transl Med* 15, eabq1533.
- 775 Guo, T., Fan, Y., Chen, M., Wu, X., Zhang, L., He, T., Wang, H., Wan, J., Wang, X., and  
776 Lu, Z. (2020). Cardiovascular Implications of Fatal Outcomes of Patients With  
777 Coronavirus Disease 2019 (COVID-19). *JAMA Cardiol* 5, 811-818.
- 778 Harkness, T.A., Nargang, F.E., van der Klei, I., Neupert, W., and Lill, R. (1994). A  
779 crucial role of the mitochondrial protein import receptor MOM19 for the biogenesis of  
780 mitochondria. *J Cell Biol* 124, 637-648.
- 781 Helluy, X., Sauter, M., Ye, Y.X., Lykowsky, G., Kreutner, J., Yilmaz, A., Jahns, R.,  
782 Boivin, V., Kandolf, R., Jakob, P.M., et al. (2017). In vivo T2\* weighted MRI visualizes  
783 cardiac lesions in murine models of acute and chronic viral myocarditis. *PLoS One* 12,  
784 e0172084.
- 785 Huang, C., Wang, Y., Li, X., Ren, L., Zhao, J., Hu, Y., Zhang, L., Fan, G., Xu, J., Gu, X.,  
786 et al. (2020). Clinical features of patients infected with 2019 novel coronavirus in  
787 Wuhan, China. *Lancet* 395, 497-506.
- 788 Humphries, A.D., Streimann, I.C., Stojanovski, D., Johnston, A.J., Yano, M.,  
789 Hoogenraad, N.J., and Ryan, M.T. (2005). Dissection of the mitochondrial import and  
790 assembly pathway for human Tom40. *J Biol Chem* 280, 11535-11543.
- 791 Jiang, D., Zhao, L., and Clapham, D.E. (2009). Genome-wide RNAi screen identifies  
792 Letm1 as a mitochondrial Ca<sup>2+</sup>/H<sup>+</sup> antiporter. *Science* 326, 144-147.
- 793 Kajihara, H., Taguchi, K., Hara, H., and Iijima, S. (1973). Electron microscopic  
794 observation of human hypertrophied myocardium. *Acta Pathol Jpn* 23, 335-347.
- 795 Kakimoto, Y., Okada, C., Kawabe, N., Sasaki, A., Tsukamoto, H., Nagao, R., and  
796 Osawa, M. (2019). Myocardial lipofuscin accumulation in ageing and sudden cardiac  
797 death. *Sci Rep* 9, 3304.
- 798 Kizilyaprak, C., Stierhof, Y.D., and Humbel, B.M. (2019). Volume microscopy in biology:  
799 FIB-SEM tomography. *Tissue Cell* 57, 123-128.

- 800 Koehler, C.M. (2004). The small Tim proteins and the twin Cx3C motif. *Trends Biochem*  
801 *Sci* 29, 1-4.
- 802 Kuroda, A., Hegab, A.E., Jingtao, G., Yamashita, S., Hizawa, N., Sakamoto, T.,  
803 Yamada, H., Suzuki, S., Ishii, M., Namkoong, H., et al. (2017). Effects of the common  
804 polymorphism in the human aldehyde dehydrogenase 2 (ALDH2) gene on the lung.  
805 *Respir Res* 18, 69.
- 806 Lee, N.C., Dimmock, D., Hwu, W.L., Tang, L.Y., Huang, W.C., Chinault, A.C., and  
807 Wong, L.J. (2009). Simultaneous detection of mitochondrial DNA depletion and single-  
808 exon deletion in the deoxyguanosine gene using array-based comparative genomic  
809 hybridisation. *Arch Dis Child* 94, 55-58.
- 810 Liao, X., Ruan, X., Wu, X., Deng, Z., Qin, S., and Jiang, H. (2023). Identification of  
811 Timm13 protein translocase of the mitochondrial inner membrane as a potential  
812 mediator of liver fibrosis based on bioinformatics and experimental verification. *J Transl*  
813 *Med* 21, 188.
- 814 Liu, X., Ren, Z., Zhan, R., Wang, X., Wang, X., Zhang, Z., Leng, X., Yang, Z., and Qian,  
815 L. (2009). Prohibitin protects against oxidative stress-induced cell injury in cultured  
816 neonatal cardiomyocyte. *Cell Stress Chaperones* 14, 311-319.
- 817 Lu, G., Ling, Y., Jiang, M., Tan, Y., Wei, D., Jiang, L., Yu, S., Jiang, F., Wang, S., Dai,  
818 Y., et al. (2023). Primary assessment of the diversity of Omicron sublineages and the  
819 epidemiologic features of autumn/winter 2022 COVID-19 wave in Chinese mainland.  
820 *Front Med* 17, 758-767.
- 821 Lustbader, J.W., Cirilli, M., Lin, C., Xu, H.W., Takuma, K., Wang, N., Caspersen, C.,  
822 Chen, X., Pollak, S., Chaney, M., et al. (2004). ABAD directly links Abeta to  
823 mitochondrial toxicity in Alzheimer's disease. *Science* 304, 448-452.
- 824 Malkoff, D.B., and Strehler, B.L. (1963). The ultrastructure of isolated and in situ human  
825 cardiac age pigment. *J Cell Biol* 16, 611-616.
- 826 Mall, G., Mattfeldt, T., and Volk, B. (1980). Ultrastructural morphometric study on the rat  
827 heart after chronic ethanol feeding. *Virchows Arch A Pathol Anat Histol* 389, 59-77.
- 828 Mandel, H., Hartman, C., Berkowitz, D., Elpeleg, O.N., Manov, I., and Iancu, T.C.  
829 (2001). The hepatic mitochondrial DNA depletion syndrome: ultrastructural changes in  
830 liver biopsies. *Hepatology* 34, 776-784.
- 831 Maron, B.J., Udelson, J.E., Bonow, R.O., Nishimura, R.A., Ackerman, M.J., Estes,  
832 N.A.M., 3rd, Cooper, L.T., Jr., Link, M.S., and Maron, M.S. (2015). Eligibility and

- 833 Disqualification Recommendations for Competitive Athletes With Cardiovascular  
834 Abnormalities: Task Force 3: Hypertrophic Cardiomyopathy, Arrhythmogenic Right  
835 Ventricular Cardiomyopathy and Other Cardiomyopathies, and Myocarditis: A Scientific  
836 Statement From the American Heart Association and American College of Cardiology. *J*  
837 *Am Coll Cardiol* 66, 2362-2371.
- 838 Merkwirth, C., Dargazanli, S., Tatsuta, T., Geimer, S., Löwer, B., Wunderlich, F.T., von  
839 Kleist-Retzow, J.C., Waisman, A., Westermann, B., and Langer, T. (2008). Prohibitins  
840 control cell proliferation and apoptosis by regulating OPA1-dependent cristae  
841 morphogenesis in mitochondria. *Genes Dev* 22, 476-488.
- 842 Nalbandian, A., Sehgal, K., Gupta, A., Madhavan, M.V., McGroder, C., Stevens, J.S.,  
843 Cook, J.R., Nordvig, A.S., Shalev, D., Sehrawat, T.S., et al. (2021). Post-acute COVID-  
844 19 syndrome. *Nat Med* 27, 601-615.
- 845 Ott, C., Dorsch, E., Fraunholz, M., Straub, S., and Kozjak-Pavlovic, V. (2015). Detailed  
846 analysis of the human mitochondrial contact site complex indicate a hierarchy of  
847 subunits. *PLoS One* 10, e0120213.
- 848 Ott, C., Ross, K., Straub, S., Thiede, B., Götz, M., Goosmann, C., Krischke, M., Mueller,  
849 M.J., Krohne, G., Rudel, T., and Kozjak-Pavlovic, V. (2012). Sam50 functions in  
850 mitochondrial intermembrane space bridging and biogenesis of respiratory complexes.  
851 *Mol Cell Biol* 32, 1173-1188.
- 852 Peddie, C.J., Genoud, C., Kreshuk, A., Meechan, K., Micheva, K.D., Narayan, K., Pape,  
853 C., Parton, R.G., Schieber, N.L., Schwab, Y., et al. (2022). Volume electron microscopy.  
854 *Nature Reviews Methods Primers* 2, 51.
- 855 Petrakis, T.G., Ktistaki, E., Wang, L., Eriksson, S., and Talianidis, I. (1999). Cloning and  
856 characterization of mouse deoxyguanosine kinase. Evidence for a cytoplasmic isoform.  
857 *J Biol Chem* 274, 24726-24730.
- 858 Phelan, D., Kim, J.H., and Chung, E.H. (2020). A Game Plan for the Resumption of  
859 Sport and Exercise After Coronavirus Disease 2019 (COVID-19) Infection. *JAMA*  
860 *Cardiol* 5, 1085-1086.
- 861 Qiu, J., Wenz, L.S., Zerbes, R.M., Oeljeklaus, S., Bohnert, M., Stroud, D.A., Wirth, C.,  
862 Ellenrieder, L., Thornton, N., Kutik, S., et al. (2013). Coupling of mitochondrial import  
863 and export translocases by receptor-mediated supercomplex formation. *Cell* 154, 596-  
864 608.
- 865 Rauschenberger, K., Schöler, K., Sass, J.O., Sauer, S., Djuric, Z., Rumig, C., Wolf, N.I.,  
866 Okun, J.G., Kölker, S., Schwarz, H., et al. (2010). A non-enzymatic function of 17beta-



- 867 hydroxysteroid dehydrogenase type 10 is required for mitochondrial integrity and cell  
868 survival. *EMBO Mol Med* 2, 51-62.
- 869 Richter-Dennerlein, R., Korwitz, A., Haag, M., Tatsuta, T., Dargazanli, S., Baker, M.,  
870 Decker, T., Lamkemeyer, T., Rugarli, E.I., and Langer, T. (2014). DNAJC19, a  
871 mitochondrial cochaperone associated with cardiomyopathy, forms a complex with  
872 prohibitins to regulate cardiolipin remodeling. *Cell Metab* 20, 158-171.
- 873 Sagar, S., Liu, P.P., and Cooper, L.T., Jr. (2012). Myocarditis. *Lancet* 379, 738-747.
- 874 Seferović, P.M., Tsutsui, H., McNamara, D.M., Ristić, A.D., Basso, C., Bozkurt, B.,  
875 Cooper, L.T., Jr., Filippatos, G., Ide, T., Inomata, T., et al. (2021). Heart Failure  
876 Association of the ESC, Heart Failure Society of America and Japanese Heart Failure  
877 Society Position statement on endomyocardial biopsy. *Eur J Heart Fail* 23, 854-871.
- 878 Shang, J., Ye, G., Shi, K., Wan, Y., Luo, C., Aihara, H., Geng, Q., Auerbach, A., and Li,  
879 F. (2020). Structural basis of receptor recognition by SARS-CoV-2. *Nature* 581, 221-  
880 224.
- 881 Signorile, A., Sgaramella, G., Bellomo, F., and De Rasmio, D. (2019). Prohibitins: A  
882 Critical Role in Mitochondrial Functions and Implication in Diseases. *Cells* 8.
- 883 Skrzypiec-Spring, M., Haczkiwicz, K., Sapa, A., Piasecki, T., Kwiatkowska, J.,  
884 Ceremuga, I., Wozniak, M., Biczysko, W., Kobierzycki, C., Dziegiel, P., et al. (2018).  
885 Carvedilol Inhibits Matrix Metalloproteinase-2 Activation in Experimental Autoimmune  
886 Myocarditis: Possibilities of Cardioprotective Application. *J Cardiovasc Pharmacol Ther*  
887 23, 89-97.
- 888 Skrzypiec-Spring, M., Sapa-Wojciechowska, A., Haczkiwicz-Leśniak, K., Piasecki, T.,  
889 Kwiatkowska, J., Podhorska-Okołów, M., and Szeląg, A. (2021). HMG-CoA Reductase  
890 Inhibitor, Simvastatin Is Effective in Decreasing Degree of Myocarditis by Inhibiting  
891 Metalloproteinases Activation. *Biomolecules* 11, 1415.
- 892 Taanman, J.W., Bodnar, A.G., Cooper, J.M., Morris, A.A., Clayton, P.T., Leonard, J.V.,  
893 and Schapira, A.H. (1997). Molecular mechanisms in mitochondrial DNA depletion  
894 syndrome. *Hum Mol Genet* 6, 935-942.
- 895 Tamai, S., Iida, H., Yokota, S., Sayano, T., Kiguchiya, S., Ishihara, N., Hayashi, J.,  
896 Mihara, K., and Oka, T. (2008). Characterization of the mitochondrial protein LETM1,  
897 which maintains the mitochondrial tubular shapes and interacts with the AAA-ATPase  
898 BCS1L. *J Cell Sci* 121, 2588-2600.

- 899 Vercellino, I., and Sazanov, L.A. (2022). The assembly, regulation and function of the  
900 mitochondrial respiratory chain. *Nat Rev Mol Cell Biol* 23, 141-161.
- 901 Viscomi, C., Spinazzola, A., Maggioni, M., Fernandez-Vizarra, E., Massa, V., Pagano,  
902 C., Vettor, R., Mora, M., and Zeviani, M. (2009). Early-onset liver mtDNA depletion and  
903 late-onset proteinuric nephropathy in Mpv17 knockout mice. *Hum Mol Genet* 18, 12-26.
- 904 Wang, D., Hu, B., Hu, C., Zhu, F., Liu, X., Zhang, J., Wang, B., Xiang, H., Cheng, Z.,  
905 Xiong, Y., et al. (2020). Clinical Characteristics of 138 Hospitalized Patients With 2019  
906 Novel Coronavirus-Infected Pneumonia in Wuhan, China. *Jama* 323, 1061-1069.
- 907 Wang, X., Cai, B., Jia, Z., Chen, Y., Guo, S., Liu, Z., Wan, X., Zhang, F., and Hu, B.  
908 (2024). MitoStructSeg: A Comprehensive Platform for Mitochondrial Structure  
909 Segmentation and Analysis. *bioRxiv* 2024, 601295.
- 910 Wu, N.N., and Ren, J. (2019). Aldehyde Dehydrogenase 2 (ALDH2) and Aging: Is There  
911 a Sensible Link? *Adv Exp Med Biol* 1193, 237-253.
- 912 Xie, Y., Xu, E., Bowe, B., and Al-Aly, Z. (2022). Long-term cardiovascular outcomes of  
913 COVID-19. *Nat Med* 28, 583-590.
- 914 Xu, R., Kang, L., Wei, S., Yang, C., Fu, Y., Ding, Z., and Zou, Y. (2021). Samm50  
915 Promotes Hypertrophy by Regulating Pink1-Dependent Mitophagy Signaling in  
916 Neonatal Cardiomyocytes. *Front Cardiovasc Med* 8, 748156.
- 917 Yang, J., Chen, T., and Zhou, Y. (2021). Mediators of SARS-CoV-2 entry are  
918 preferentially enriched in cardiomyocytes. *Hereditas* 158, 4.
- 919 Zeitlow, K., Charlabous, L., Ng, I., Gagrani, S., Mihovilovic, M., Luo, S., Rock, D.L.,  
920 Saunders, A., Roses, A.D., and Gottschalk, W.K. (2017). The biological foundation of  
921 the genetic association of TOMM40 with late-onset Alzheimer's disease. *Biochim*  
922 *Biophys Acta Mol Basis Dis* 1863, 2973-2986.
- 923 Zhang, X.M., Li, Y.C., Chen, P., Ye, S., Xie, S.H., Xia, W.J., and Yang, J.H. (2020). MG-  
924 132 attenuates cardiac deterioration of viral myocarditis via AMPK pathway. *Biomed*  
925 *Pharmacother* 126, 110091.
- 926 Zwacka, R.M., Reuter, A., Pfaff, E., Moll, J., Gorgas, K., Karasawa, M., and Weiher, H.  
927 (1994). The glomerulosclerosis gene Mpv17 encodes a peroxisomal protein producing  
928 reactive oxygen species. *Embo j* 13, 5129-5134.  
929
